# Supplementary material
Source: PubMed Central journal article supplement (PMC6755746)
Supplement: JB.00321-19-s0001.pdf [file JB.00321-19-s0001.pdf]

**Supplement to: Expansion of the spore surface polysaccharide layer in *Bacillus subtilis* by deletion of genes encoding glycosyltransferases and glucose modification enzymes**

Running title: Properties of *B. subtilis* spore surface polysaccharides

Bentley Shuster<sup>1\*</sup>, Mark Khemmani<sup>2\*</sup>, Yusei Nakaya<sup>3\*</sup>, Gudrun Holland<sup>4</sup>, Keito Iwamoto<sup>3</sup>, Kimihiro Abe<sup>5</sup>, Daisuke Imamura<sup>3</sup>, Nina Maryn<sup>1</sup>, Adam Driks<sup>2†</sup>, Tsutomu Sato<sup>3,5</sup> and Patrick Eichenberger<sup>1#</sup>

<sup>1</sup>Center for Genomics and Systems Biology, Department of Biology, New York University, New York, NY10003, USA

<sup>2</sup>Department of Microbiology and Immunology, Stritch School of Medicine, Loyola University Chicago, Maywood, IL 60153, USA

<sup>3</sup>Department of Frontier Bioscience, Hosei University, Koganei, Tokyo, Japan

<sup>4</sup>Advanced Light and Electron Microscopy (ZBS 4), Robert Koch Institute, D-13353, Berlin, Germany

<sup>5</sup>Research Center for Micro-Nano Technology, Hosei University, Koganei, Tokyo, Japan

\*equal contribution

†Deceased, June 7<sup>th</sup>, 2019

#Corresponding author: [pe19@nyu.edu](mailto:pe19@nyu.edu)

**Figure S1 – Putative enzymatic pathways involved in spore PS production.** **Left:** The experimentally characterized pathway from glucose-1-phosphate to dTDP-rhamnose catalyzed by enzymes encoded by *spsIJKL*. **Center:** Putative pathway with enzymes encoded by *spsCDEF*. **Right:** Putative enzymatic pathways encoded by gene clusters *yfnH-D* and *ytdA-ytcABC*. All enzymes are color-coded based on their inferred or experimentally validated functions according to key on the right. All acronyms are explained in key on the left.

Figure S1

Experimentally characterized pathway:

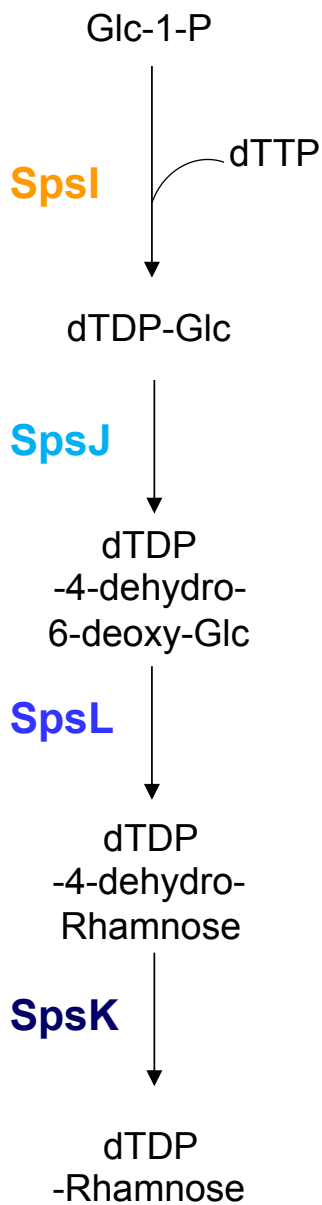

Putative pathways:

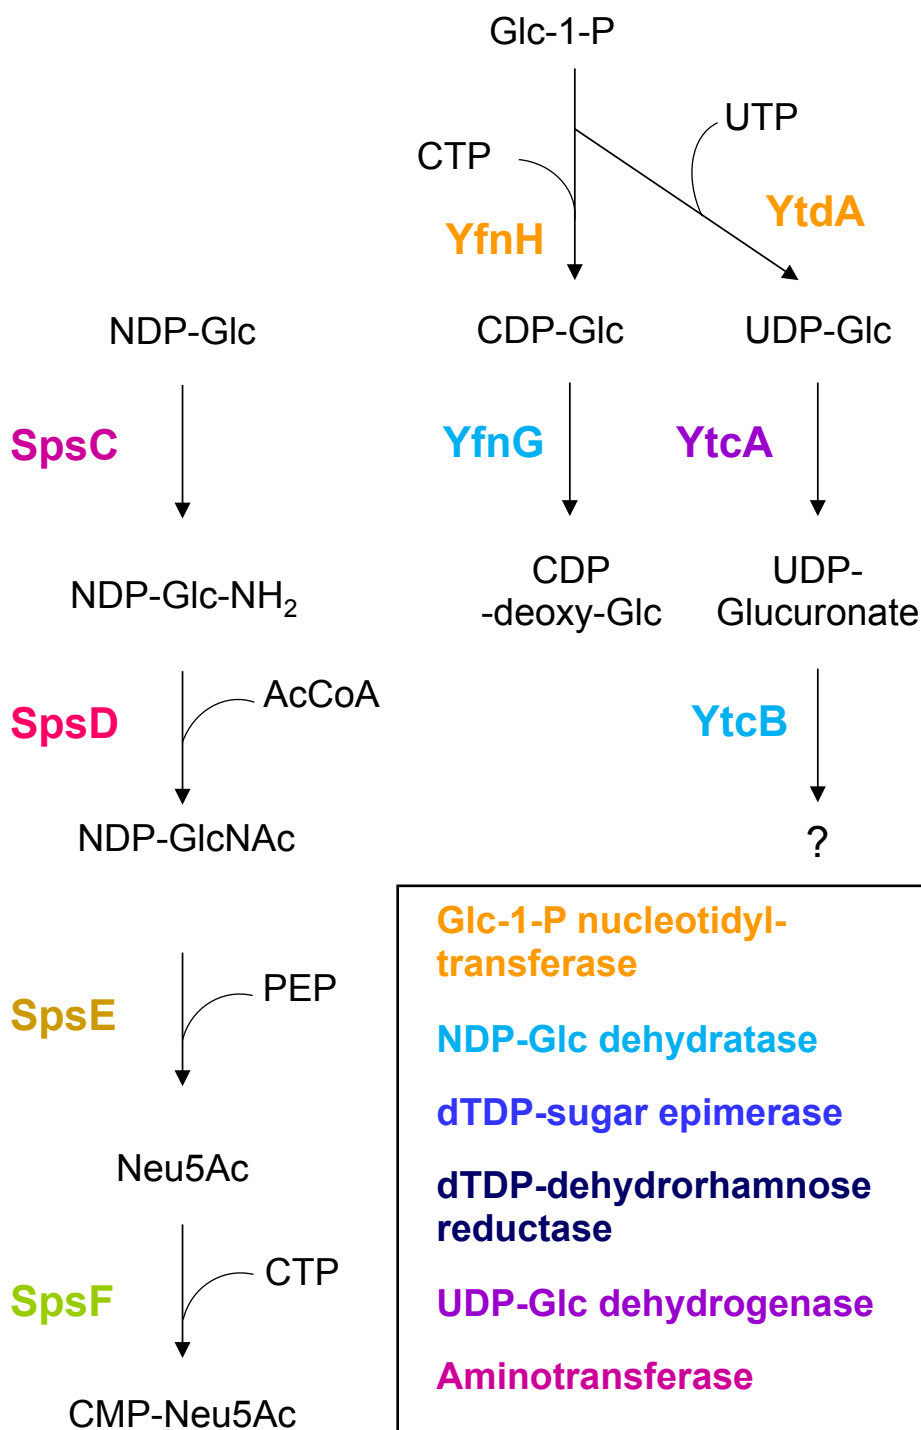

Ac=Acetyl  
 Glc=Glucose  
 NDP= CDP, dTDP or UDP  
 Neu5Ac=N-Acetylneuraminate  
 P=Phosphate  
 PEP=Phosphoenolpyruvate

**Glc-1-P nucleotidyl-transferase**  
**NDP-Glc dehydratase**  
**dTDP-sugar epimerase**  
**dTDP-dehydrorhamnose reductase**  
**UDP-Glc dehydrogenase**  
**Aminotransferase**  
**Acyl-CoA N-acyltransferase**  
**Phosphoenolpyruvate-sugar pyruvyltransferase**  
**Cytidyltransferase**

**Figure S2. Contributions of the *spsA-L* operon to spore surface properties.** **A.** BATH assay of spores with the following gene deletions:  $\Delta$ *spsA* (PE3341),  $\Delta$ *spsB* (PE3342),  $\Delta$ *spsC* (PE3343),  $\Delta$ *spsD* (PE3344),  $\Delta$ *spsE* (PE3345),  $\Delta$ *spsF* (PE3346),  $\Delta$ *spsG* (PE3347). Experiments were performed in triplicate; error bars represent standard deviation. Each individual deletion causes an increase in relative hydrophobicity profile as compared to wild type spores. **B.** India Ink staining reveals the presence of a PS layer (halo) by negative staining in wild type spores (168). The *spsA-L* mutant spores exhibit no halo, suggesting disruption of the PS layer:  $\Delta$ *spsA* (BKE37910),  $\Delta$ *spsB* (BKE37900),  $\Delta$ *spsC* (BKE37890),  $\Delta$ *spsD* (BKE37880),  $\Delta$ *spsE* (BKE37870),  $\Delta$ *spsF* (BKE37860),  $\Delta$ *spsG* (BKE37850). Scale bars are 2.5  $\mu$ m. Similar results are obtained with deletions downstream of *spsI* (Figure 2) or by deletion of the entire *sps* operon:  $\Delta$ *spsA-L* (NY212). **C.** Analysis of the localization during sporulation of the crust proteins CotX-GFP, CotY-GFP, CotZ-GFP and CgeA-GFP in wild type (PE3151, PE3158, HS176, PE3260),  $\Delta$ *spsI* (PE3245, PE3242, PE3248, PE3323) and  $\Delta$ *yfnH* (PE3244, PE3243, PE3247, PE3322) strains. Localization is identical in the mutant and wild type strains, suggesting that a deletion of *spsI* or *yfnH* does not interfere with crust protein assembly but alters PS deposition.

Figure S2

A.

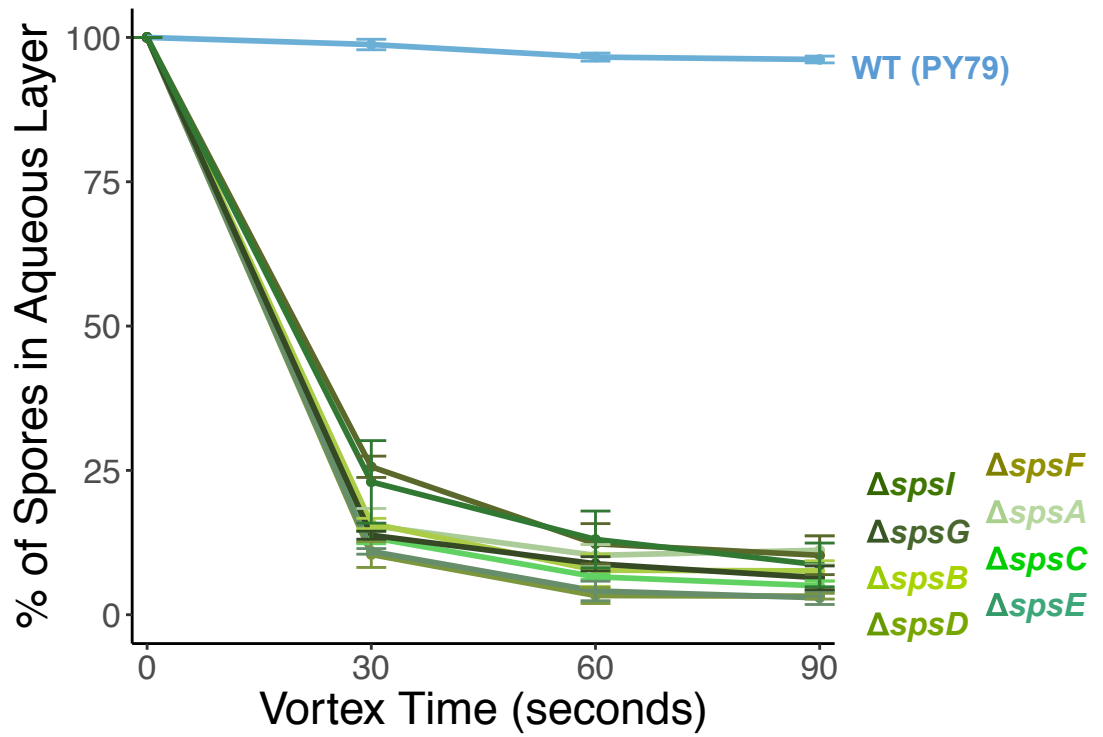

B.

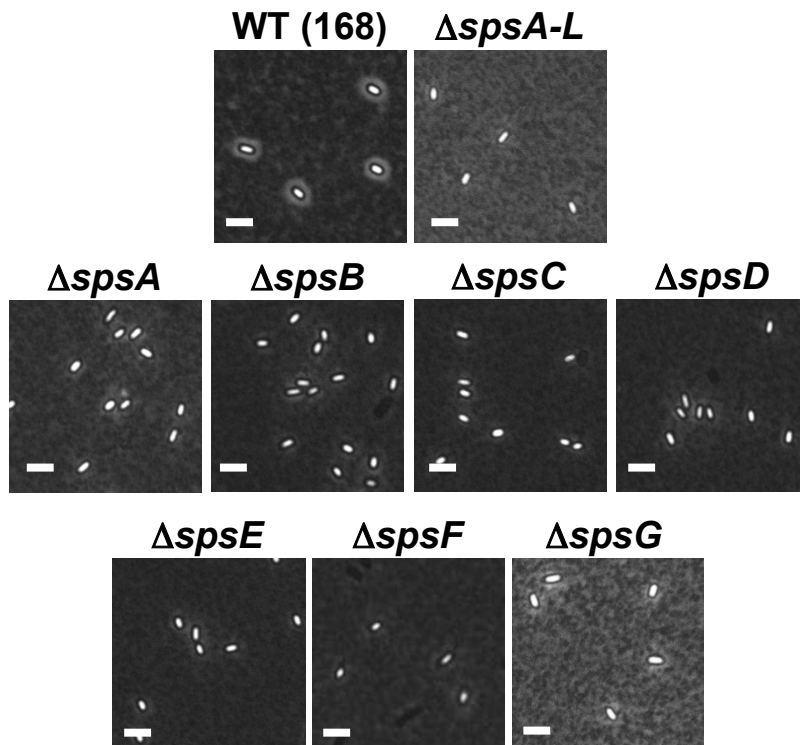

Figure S2  
(continued)

C.

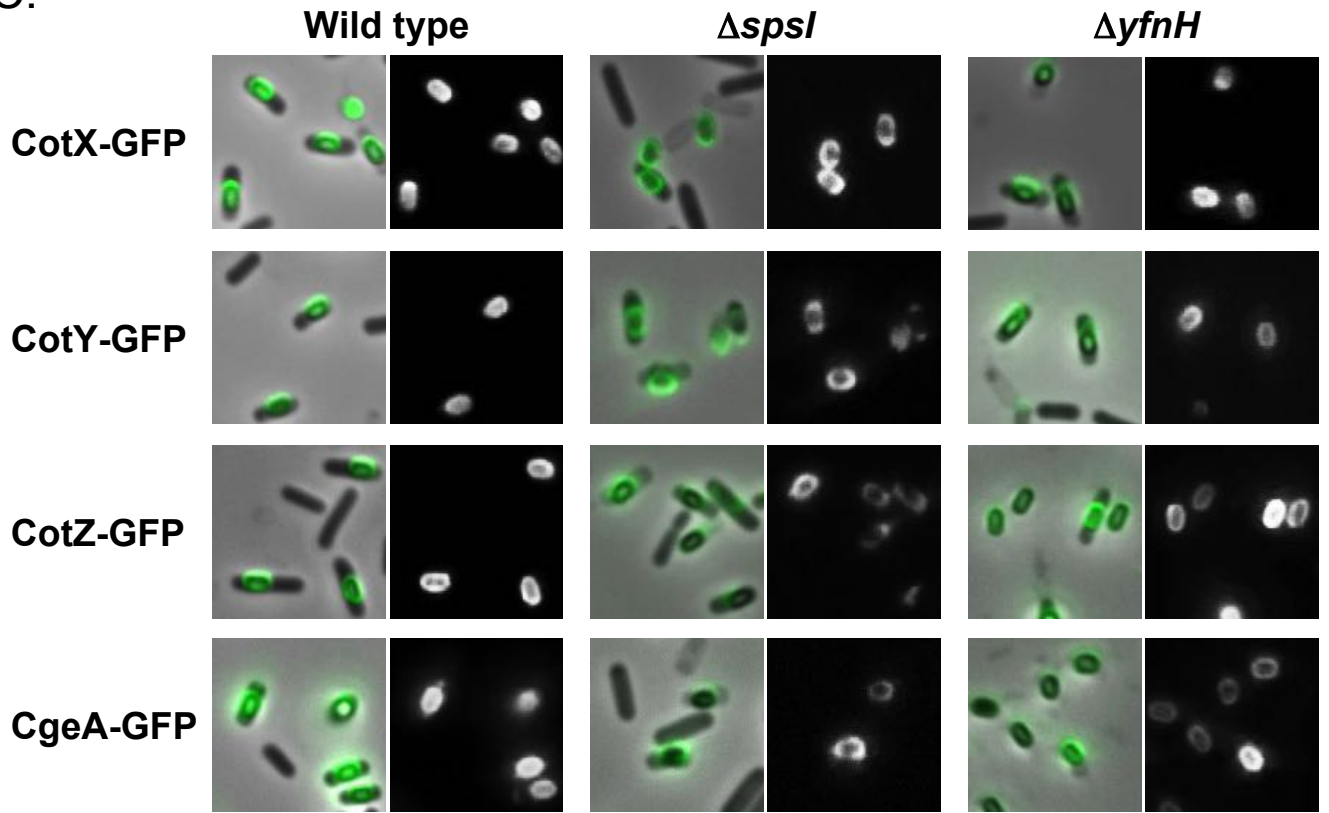

**Figure S3. Putative glucose-1-phosphate nucleotidyl-transferases expressed during late sporulation play different roles in spore PS synthesis.** **A.** Measurements of the halo areas (numbers of spores correspond to the number of spores considered for the measurements) in wild type spores (168) and  $\Delta ytdA$  spores (BKE30850). The halo size is not significantly different between the two strains. **B.** Field of wild type (PY79) spores by TEM with Ruthenium red staining. All spore coat layers, including the crust, are visible. Scale bar is 500 nm. **C.** Field of  $\Delta ytdA$  spores (PE2764) by TEM with Ruthenium red staining. All spore coat layers, including the crust, are visible. Scale bar is 500 nm. **D.** Field of  $\Delta yfnH$  spores (PE2919) by TEM with Ruthenium red staining shows expansion and webbing of spore crust. Scale bars are 500 nm. **E.** Field of wild type spores (PY79) by SEM. Scale bar is 1  $\mu$ m. **F.** Field of  $\Delta spsI$  spores (PE2763) by SEM. Scale bar is 1  $\mu$ m. **G.** Field of  $\Delta yfnH$  spores (PE2919) by SEM. Scale bar is 1  $\mu$ m. A web-like structure covers the surface of most spores, especially at the spore poles. **H.** BATH analysis of spores with the following gene deletions:  $\Delta ytdA$  (PE2764),  $\Delta ytcA$  (PE2767),  $\Delta ytcB$  (PE2945),  $\Delta ytcC$  (PE2946). Experiments were performed in triplicate; error bars represent standard deviation. All mutant spores are as hydrophilic as wild type (PY79) spores. **I.** India ink staining of gene deletions:  $\Delta ytcA$  (BKE30860),  $\Delta ytcB$  (BKE30870),  $\Delta ytdcC$  (BKE30880). Halos are indistinguishable from wild type spores (168).

Figure S3

A.

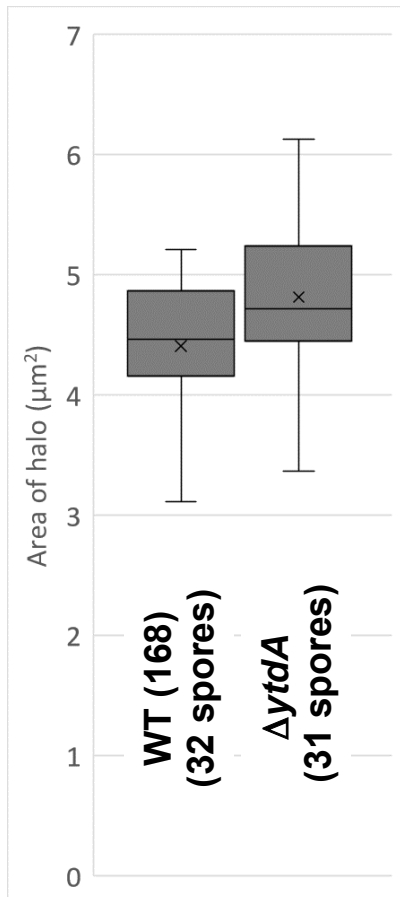

B.

WT (PY79)

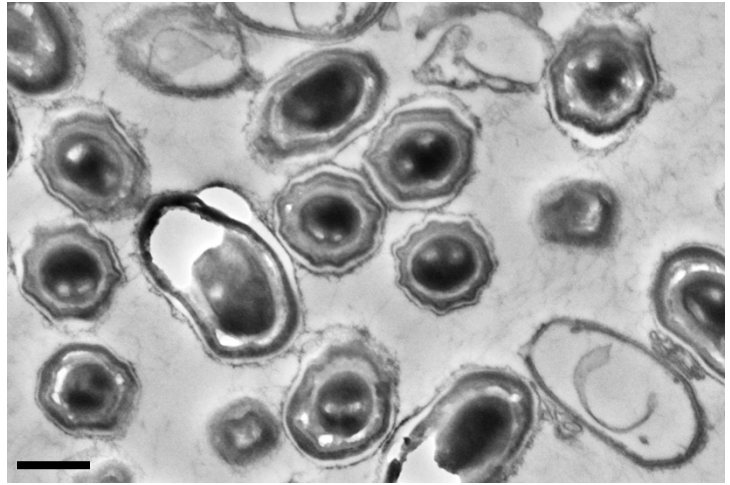

C.

$\Delta ytdA$

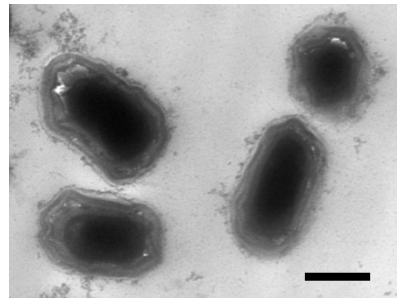

D.

$\Delta yfnH$

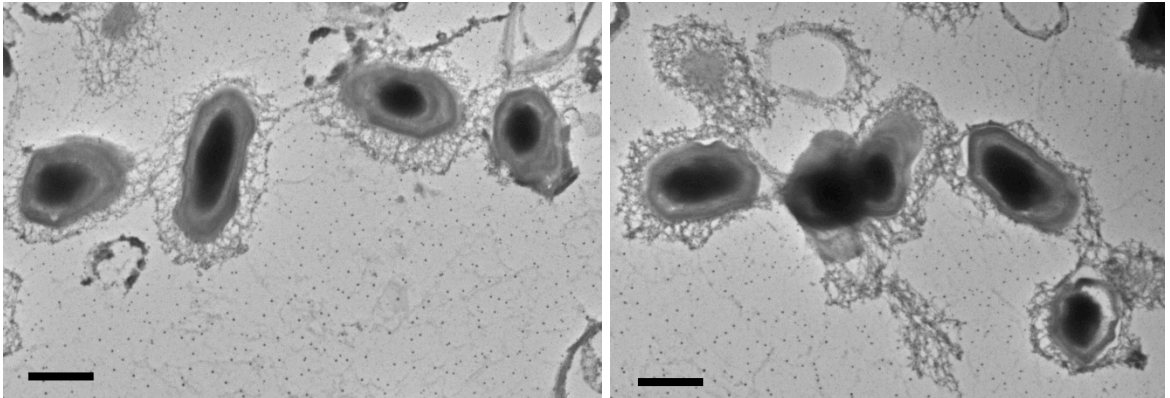



Figure S3  
(continued)

E.

WT (PY79)

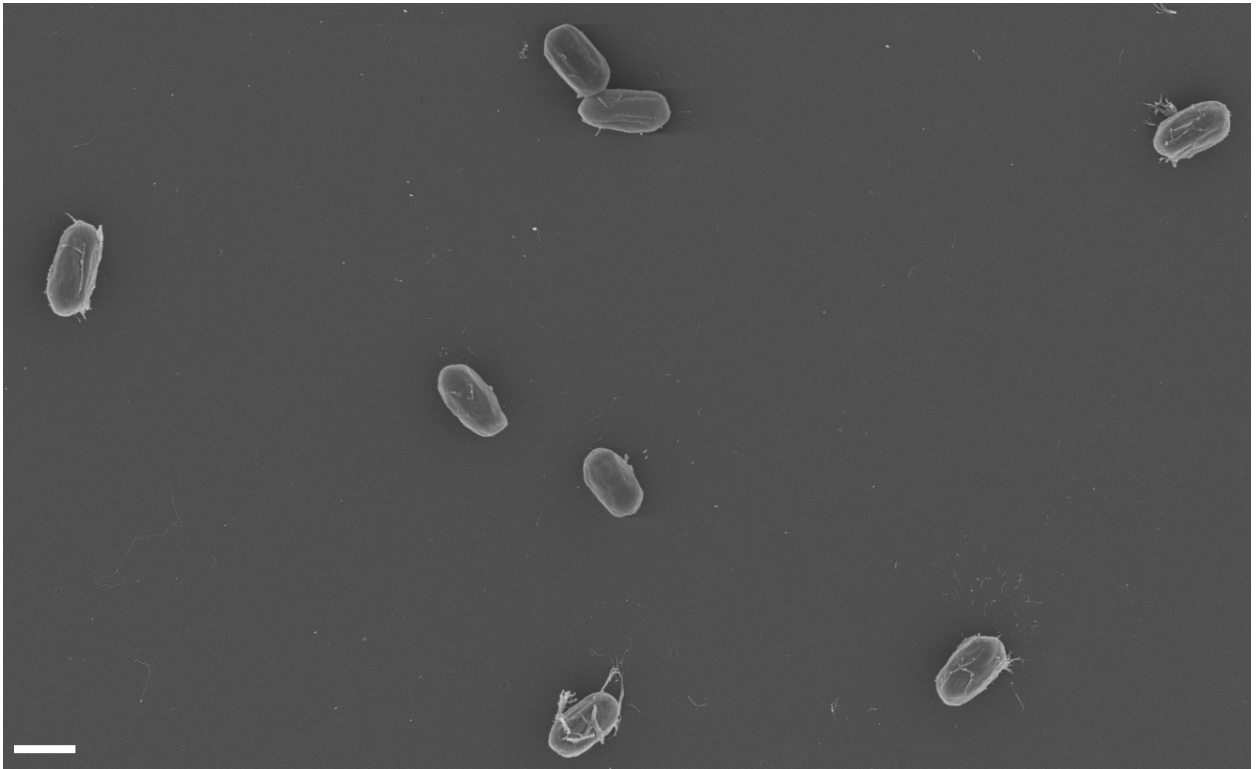

F.

$\Delta$ *spsI*

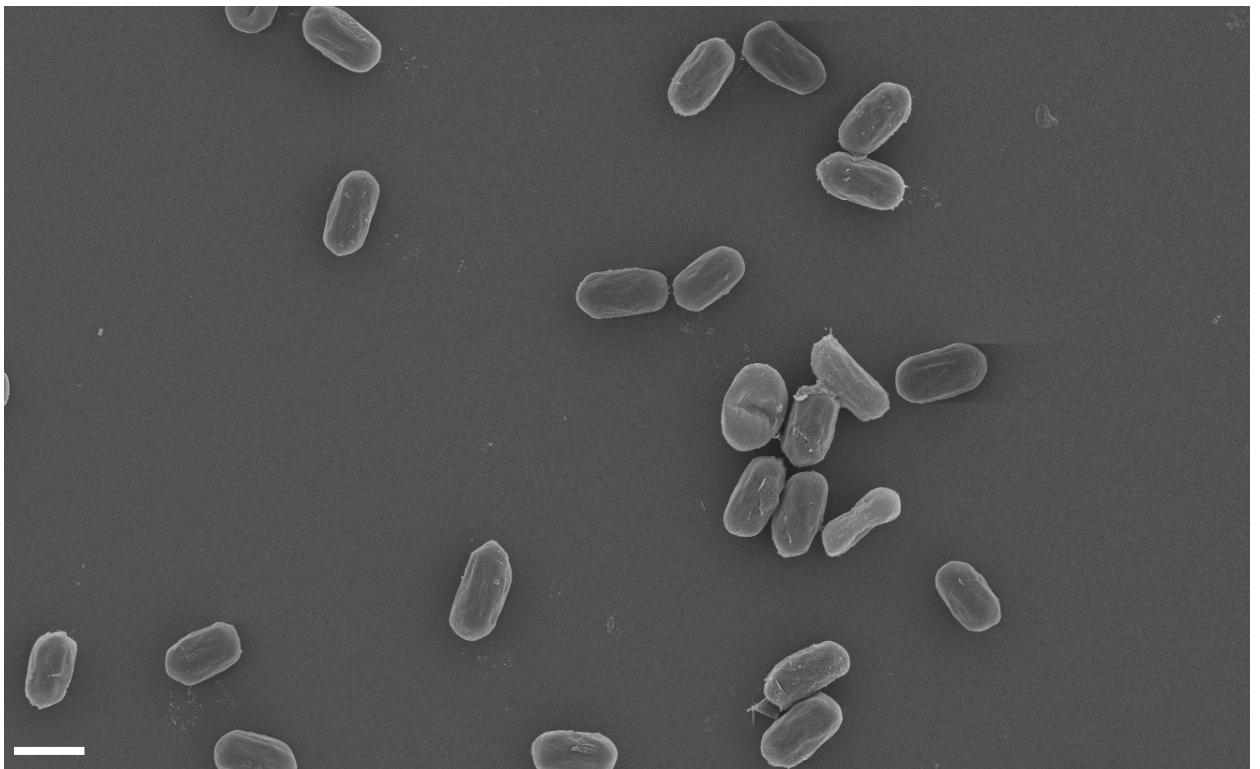

Figure S3  
(continued)  
*ΔyfnH*

G.

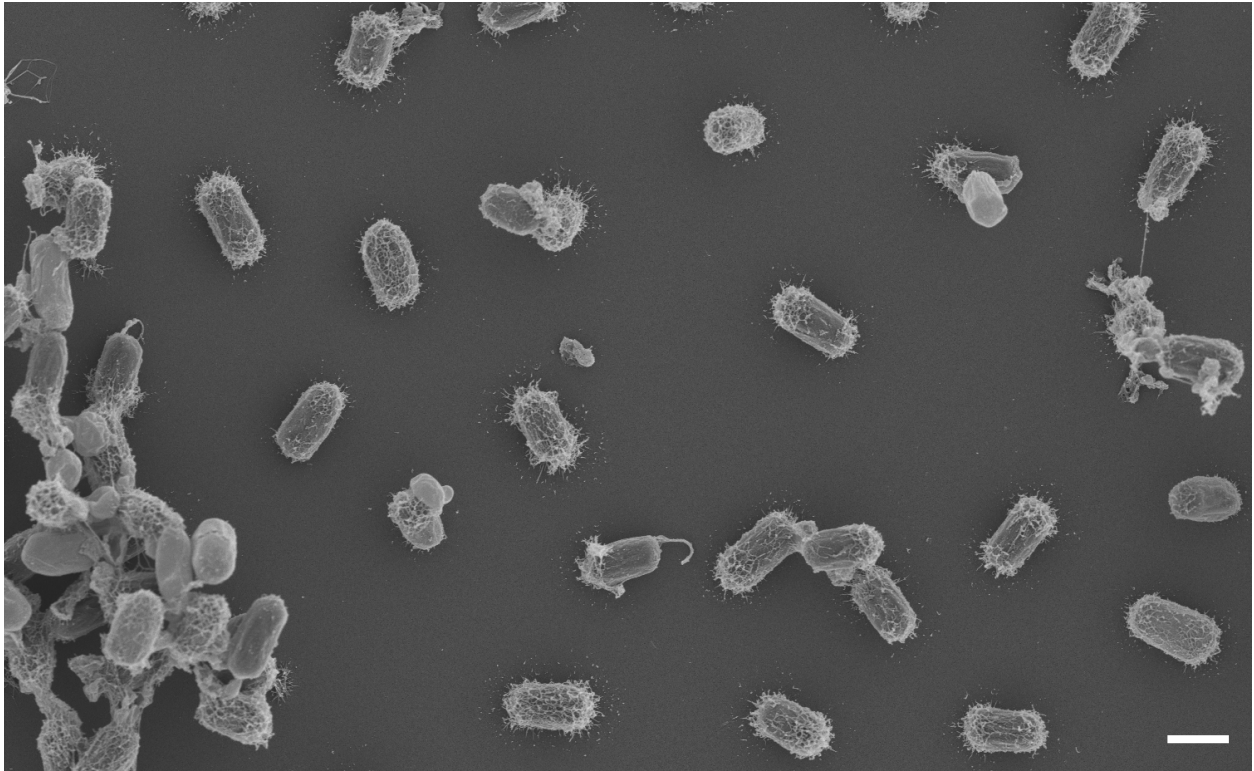

H.

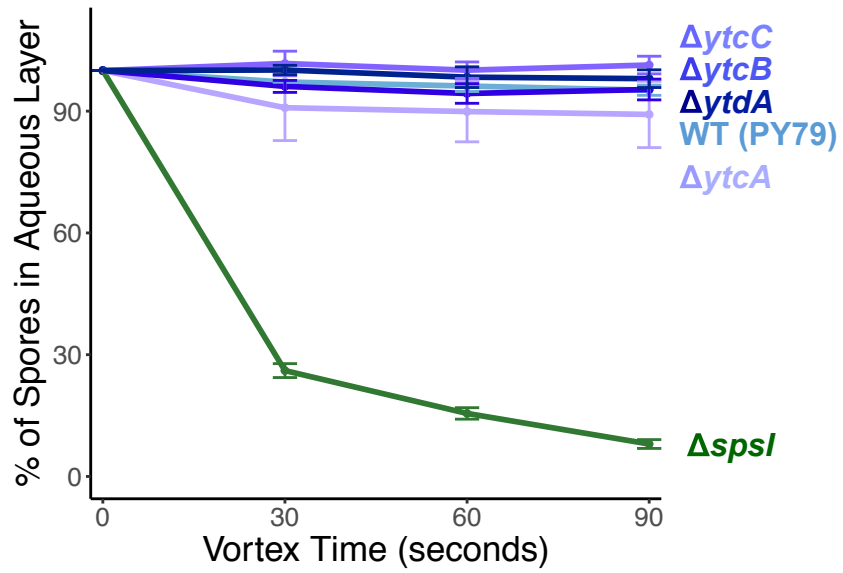

I.

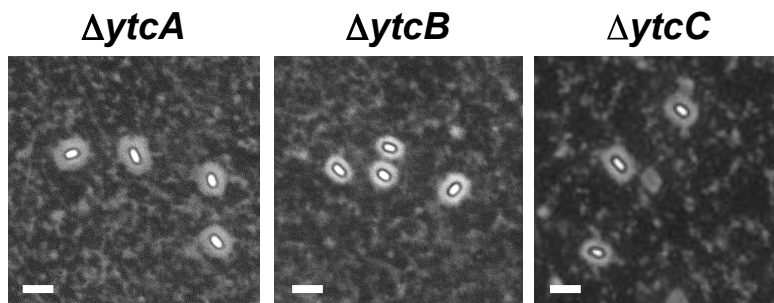

**Figure S4. Gene deletions in the *yfnH-D* cluster result in expansion of the PS layer.** **A.** Measurements of the halo areas (numbers of spores correspond to the number of spores considered for the measurements) for wild type (168),  $\Delta yfnH-D$  (NY35),  $\Delta yfnD$  (BKE07310),  $\Delta yfnE$  (BKE07300),  $\Delta yfnF$  (BKE07290),  $\Delta yfnG$  (BKE07280) and  $\Delta yfnH$  (BKE07270) spores. **B.** BATH analysis of spores with following gene deletions:  $\Delta yfnD$  (PE3060),  $\Delta yfnE$  (PE3063),  $\Delta yfnF$  (PE3062),  $\Delta yfnG$  (PE2961) and  $\Delta yfnH$  (PE2919), which are as hydrophilic as wild type spores (PY79). Experiments were performed in triplicate; error bars represent standard deviation. Fields of spores imaged by TEM with Ruthenium red staining: **C.**  $\Delta yfnE$  (PE3063), scale bar is 400 nm; **D.**  $\Delta yfnF$  (PE3062), scale bar is 500 nm; **E.**  $\Delta yfnG$  (PE2961), scale bar is 500 nm. All mutant spores exhibit expanded and web-like crust morphology. **F.** Field of  $\Delta yfnF$  spores (PE3062) by SEM. Scale bar is 1  $\mu$ m. A web-like structure covers the surface of most spore poles.

Figure S4

A.

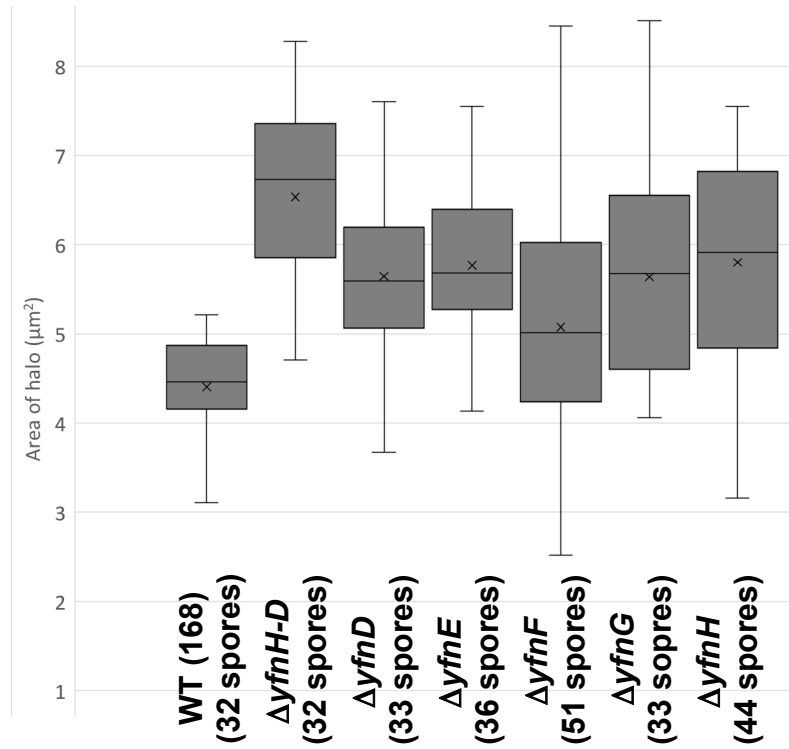

B.

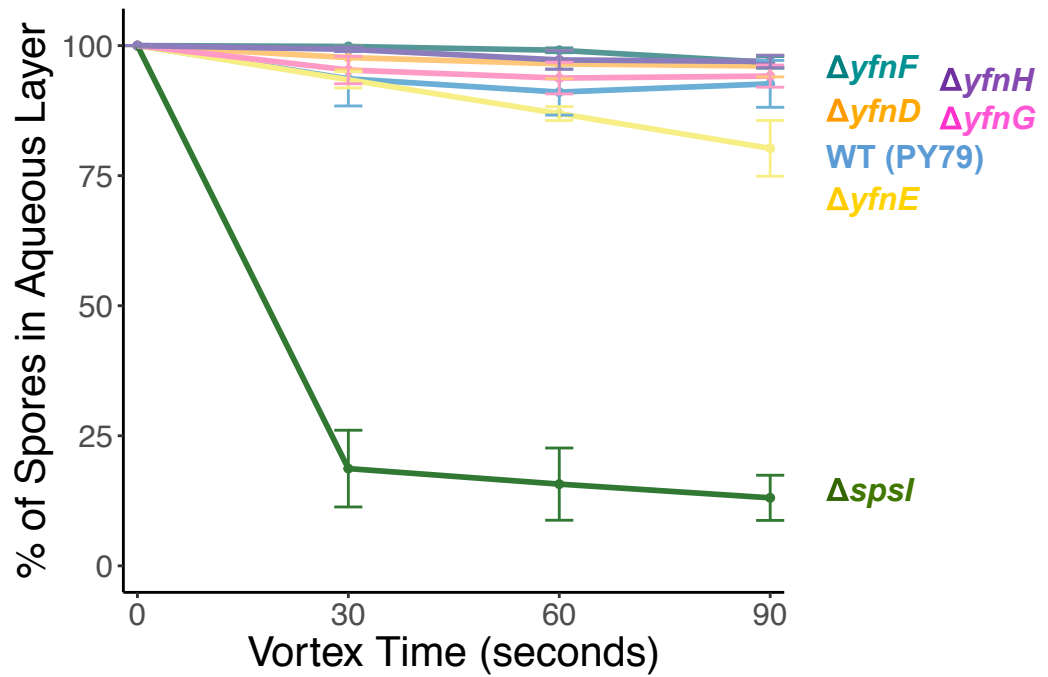

Figure S4  
(continued)

C.

*ΔyfnE*

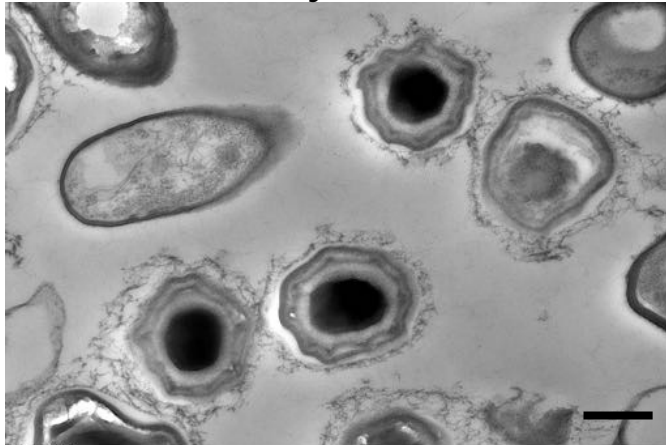

D.

*ΔyfnF*

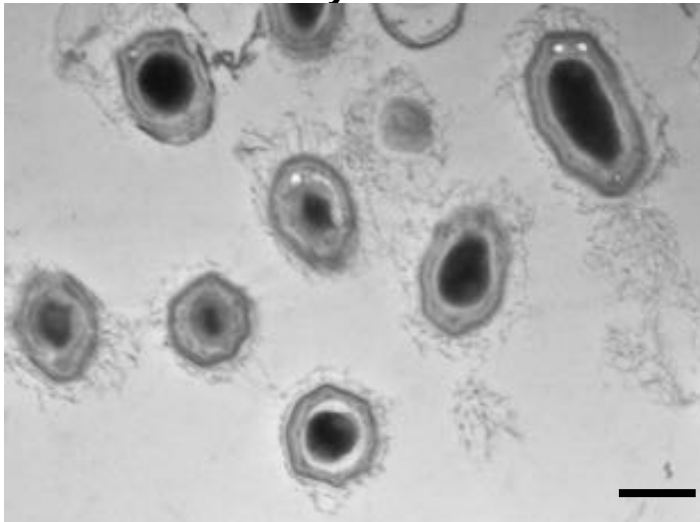

E.

*ΔyfnG*

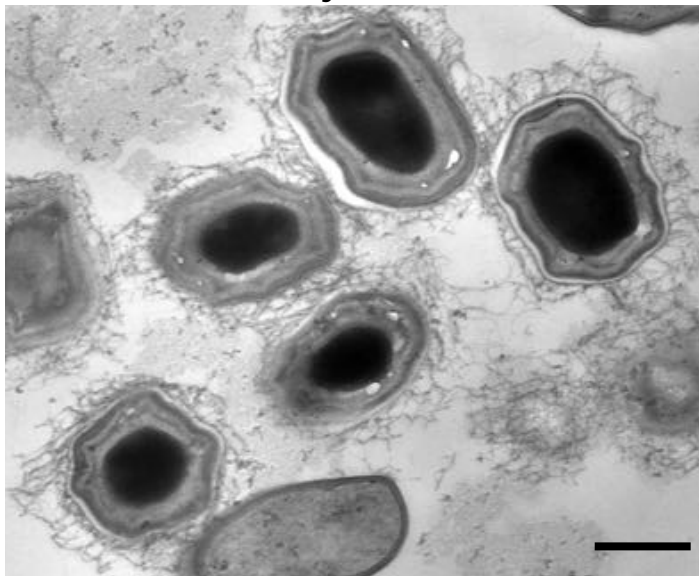

Figure S4  
(continued)

F.

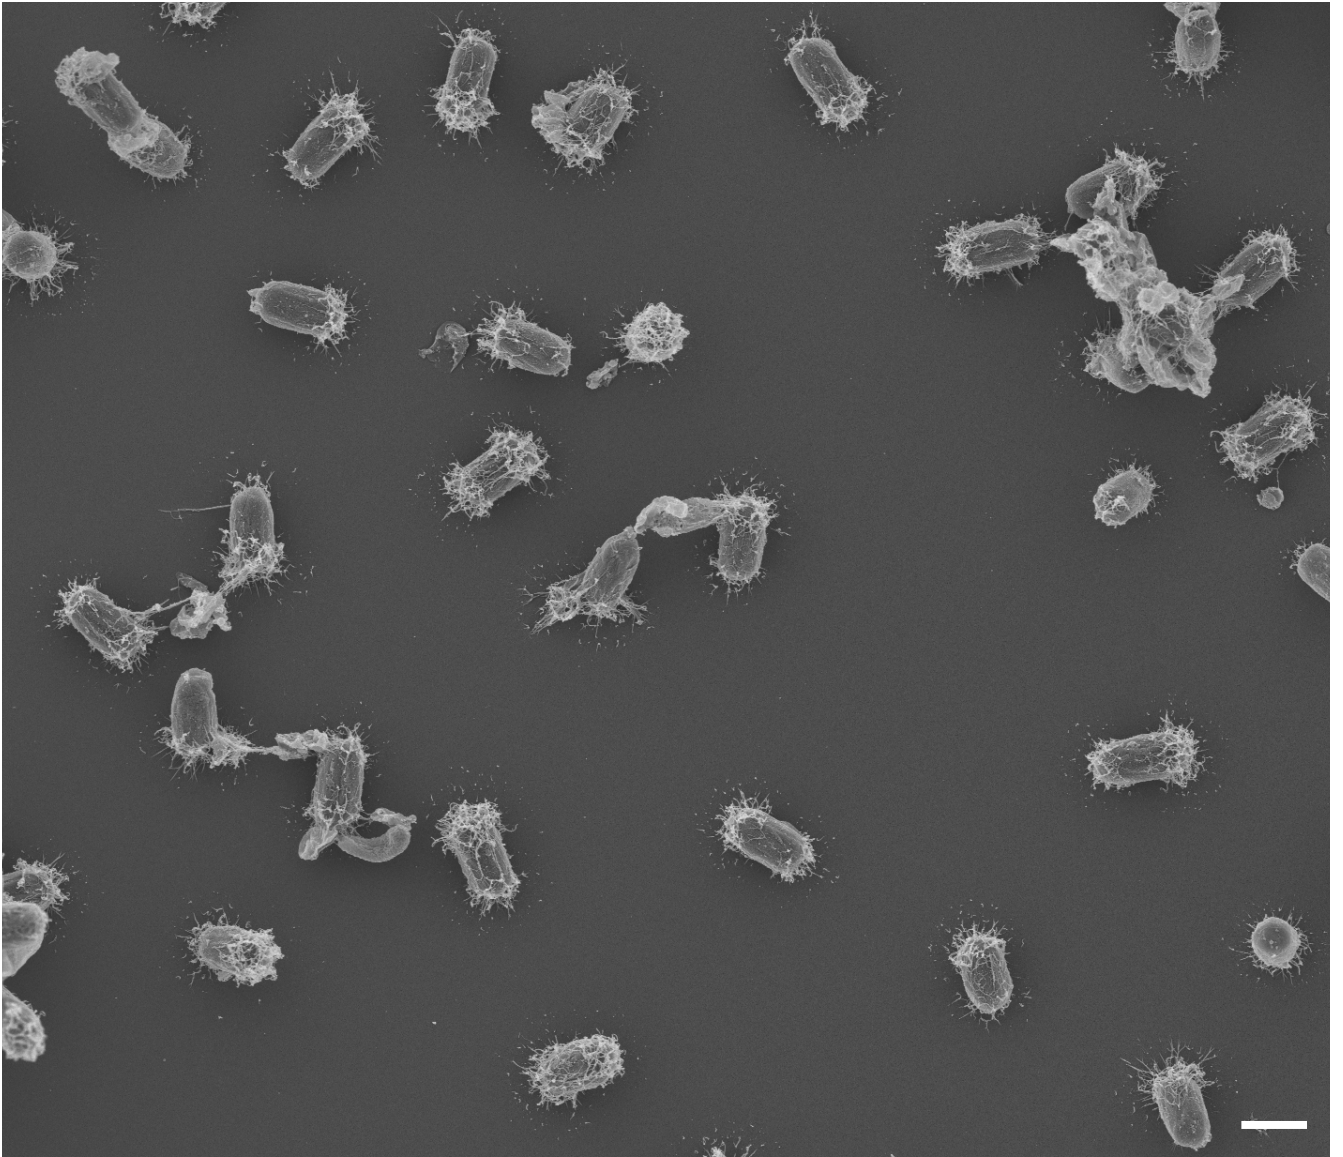

**Figure S5. Partial complementation of  $\Delta spsI$  spores by deletions in the *yfnH-D* cluster.**

**A.** BATH analysis of spores with following gene deletions:  $\Delta yfnD$  (PE3060),  $\Delta yfnE$  (PE3063),  $\Delta yfnD \Delta spsI$  (PE3357) and  $\Delta yfnE \Delta spsI$  (PE3117). Unlike the partial rescue of  $\Delta spsI$  by  $\Delta yfnH$  or  $\Delta yfnF$  (Figure 5), doubly mutant spores of  $\Delta yfnD$  or  $\Delta yfnE$  with  $\Delta spsI$  exhibit the same levels of hydrophobicity as the single  $\Delta spsI$  mutant spores. Experiments were performed in triplicate; error bars represent standard deviation. **B.** TEM with Ruthenium red of  $\Delta yfnF$  (PE3062),  $\Delta spsI$  (PE2763), and  $\Delta yfnF \Delta spsI$  (PE3118) spores. Scale bars are 200 nm. A webbed PS layer (red arrow) is characteristic of  $\Delta yfnF$  spores, whereas  $\Delta spsI$  spores have a greatly diminished crust. A return of a thin crust (red arrow) is observed in the double mutant. **C.** TEM with Ruthenium red of  $\Delta spsI$  (PE2763),  $\Delta yfnE$  (PE3063),  $\Delta yfnH$  (PE2919),  $\Delta yfnE \Delta spsI$  (PE3117) and  $\Delta yfnH \Delta spsI$  (PE3119) spores. Scale bars are 200 nm. Both  $\Delta yfnH$  and  $\Delta yfnE$  spores present a webbed and expanded PS layer (red arrow) compared to a diminished crust layer in  $\Delta spsI$ . The double mutants show a partially restored thin outermost layer (red arrow). **D.** SEM images for  $\Delta yfnH$  (PE2919) and  $\Delta yfnH \Delta spsI$  (PE3119) spores. Scale bars are 500 nm. **E.** Field of  $\Delta yfnF \Delta spsI$  (PE3118) by SEM. Scale bar is 1  $\mu$ m.

Figure S5

A.

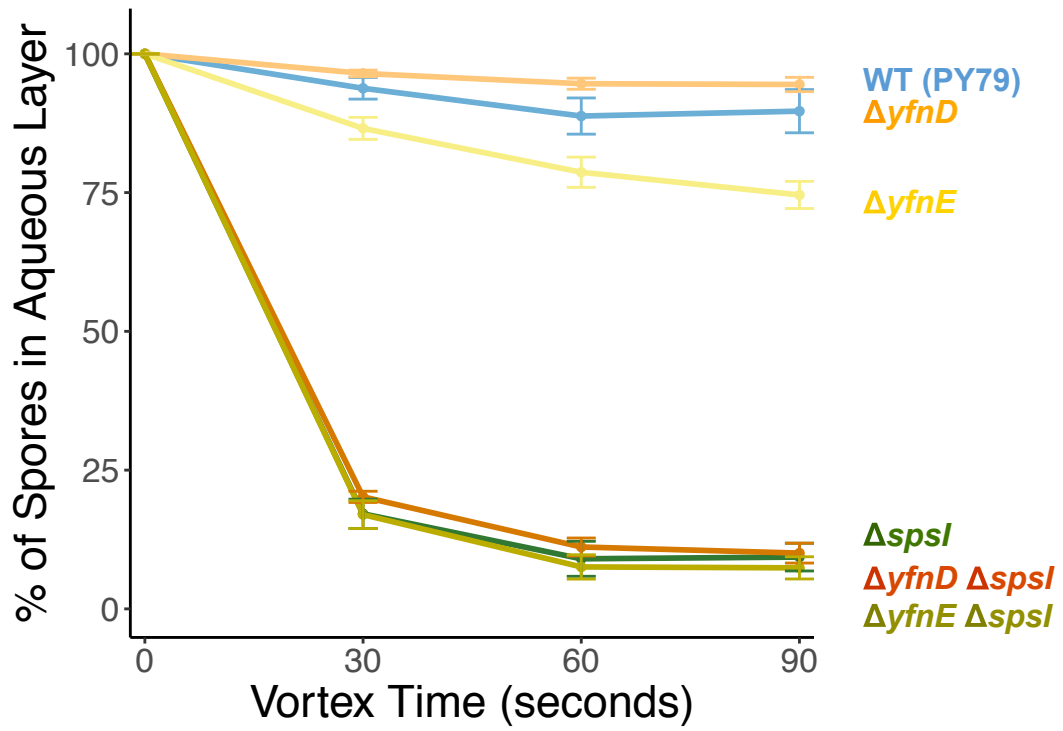

B.

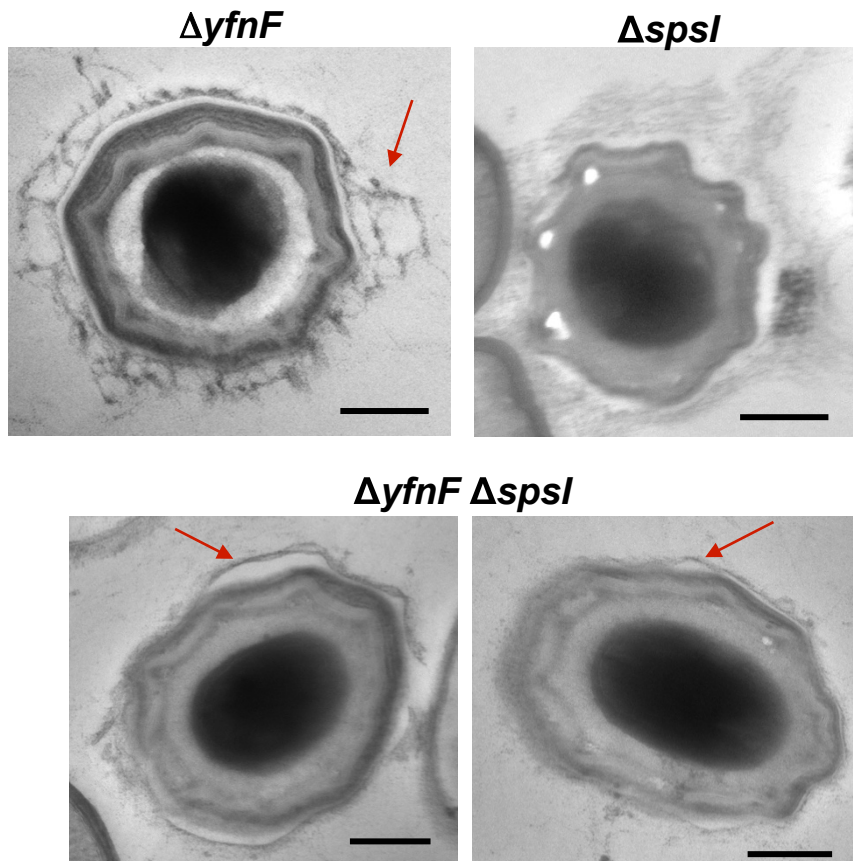



Figure S5  
(continued)

C.

*ΔspsI*

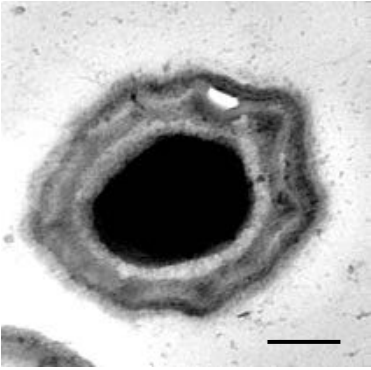

*ΔyfnE*

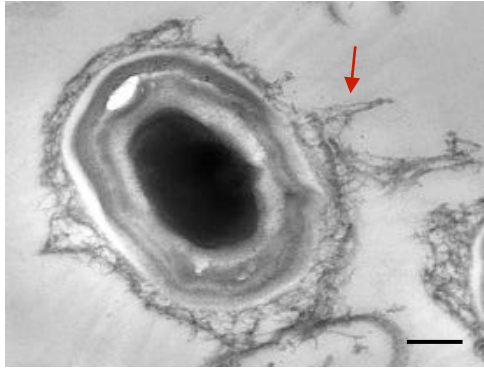

*ΔyfnH*

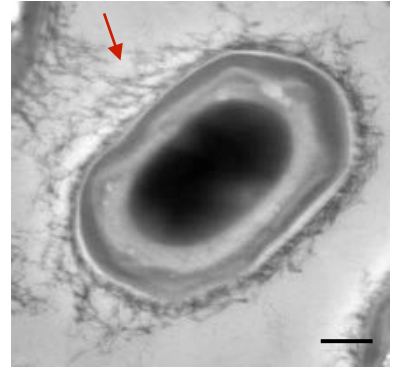

*ΔyfnE ΔspsI*

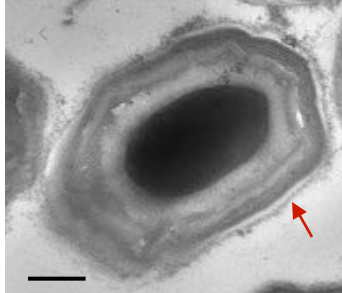

*ΔyfnH ΔspsI*

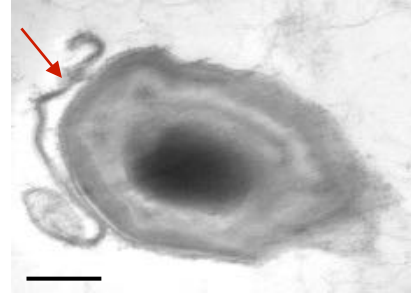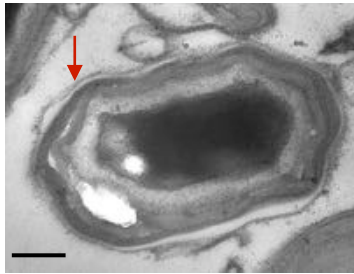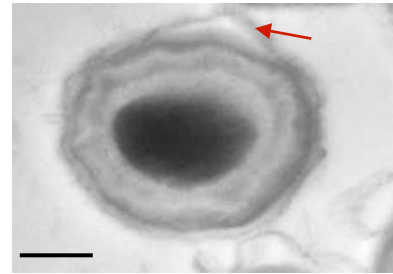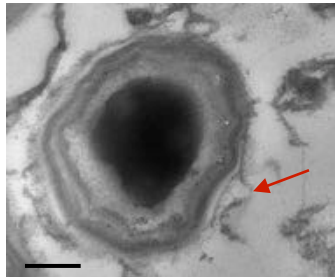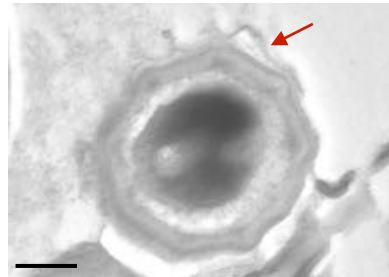

Figure S5  
(continued)

D.

*ΔyfnH*

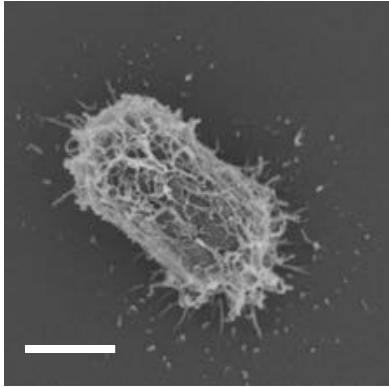

*ΔyfnH ΔspsI*

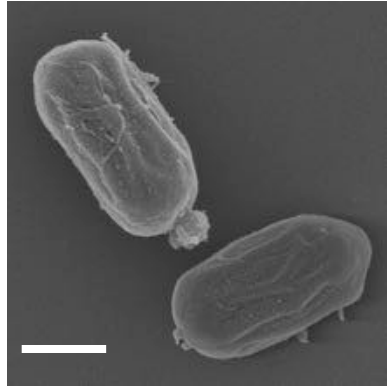

*ΔyfnH ΔspsI*

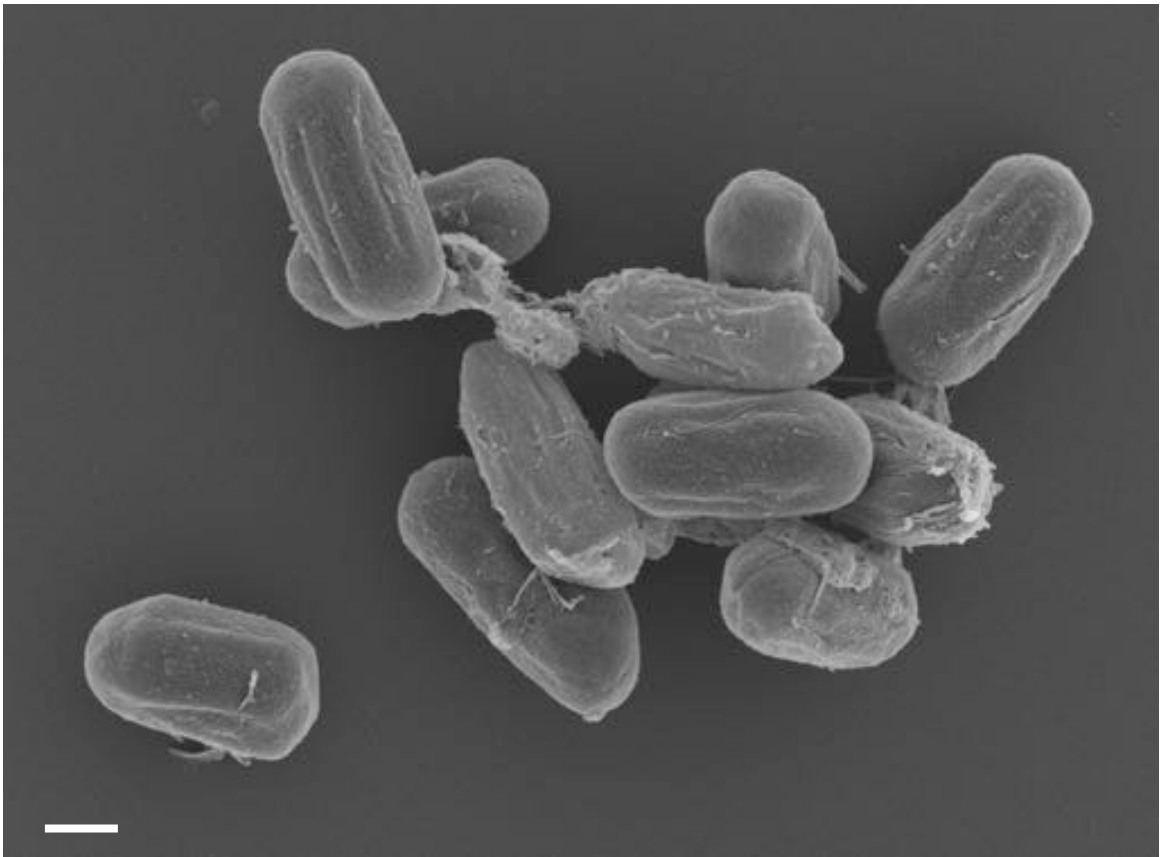

Figure S5  
(continued)

E.

*ΔyfnF ΔspsI*

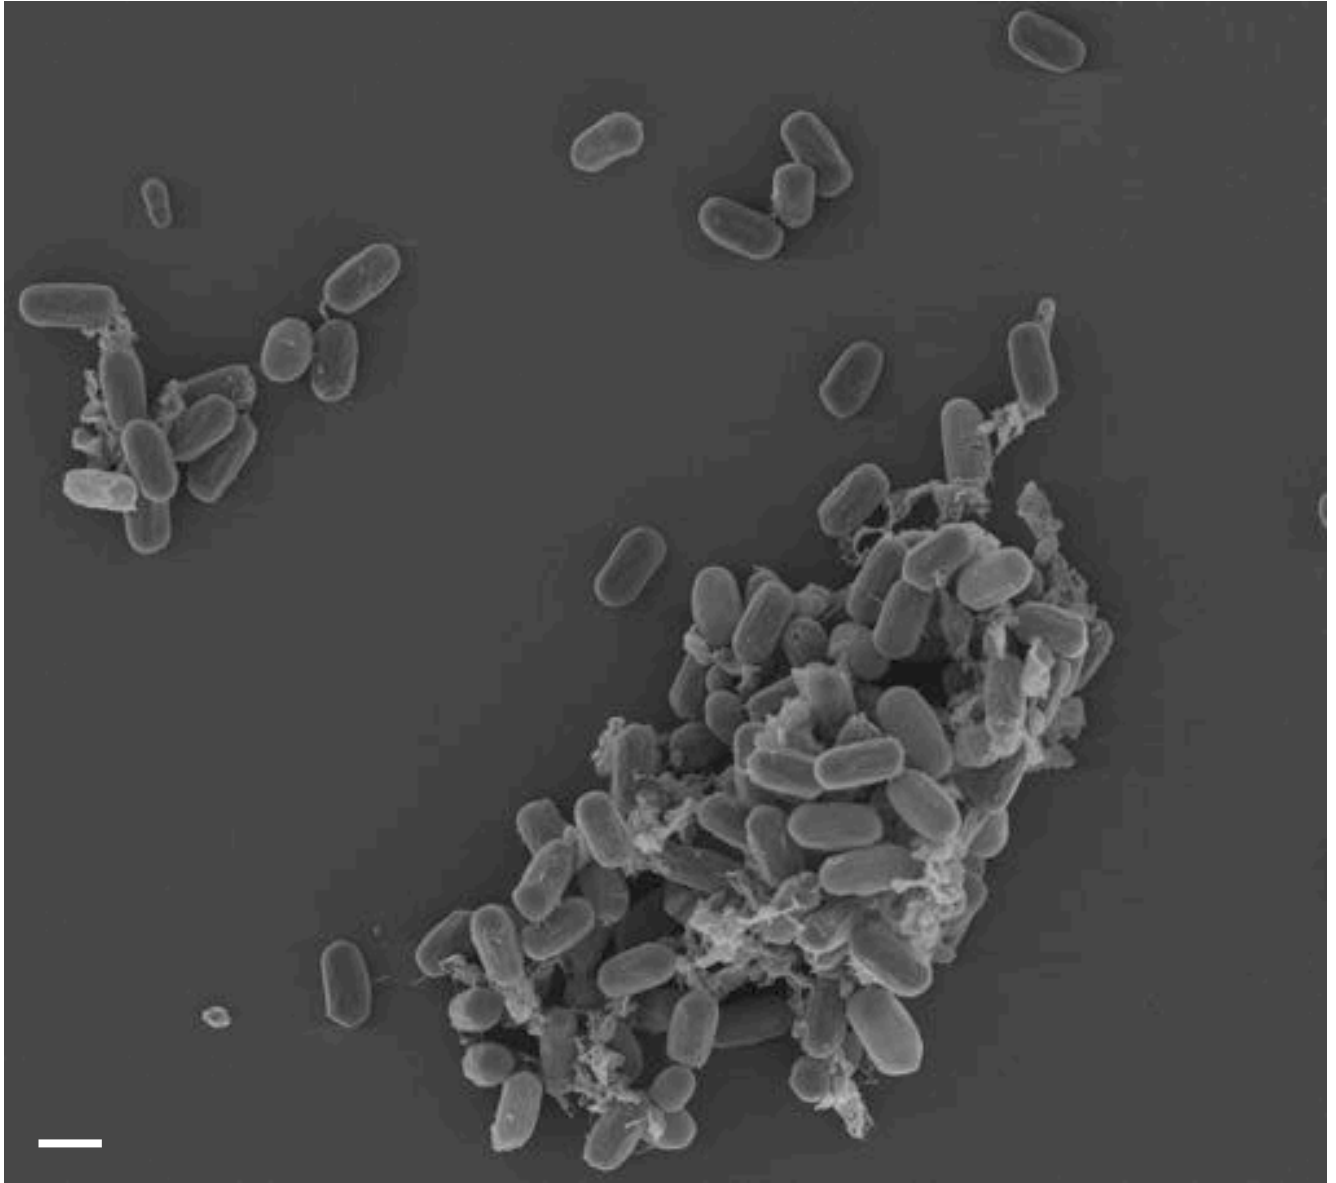

**Figure S6. Analysis of spore surface properties in mutants with deletions in the *cgeCDE* operon. A.** Measurements of the halo areas (numbers of spores correspond to the number of spores considered for the measurements) in wild type (168) and  $\Delta cgeD$  spores (BKE19750). A large expansion of the halo area is observed for  $\Delta cgeD$  spores. **B.** India ink staining images of the spores used for quantification (as displayed in A). **C.** Analyses of spore surface extracts by gel electrophoresis (5% polyacrylamide, TBE, stained with Stains-All).  $\Delta cgeD$  mutants show an increase in size presumably caused by an expansion in PS content. **D.** BATH assay of  $\Delta cgeD$  spores (RL1405) compared to wild type spores (PY79),  $\Delta spsI$  spores (PE2763), and doubly mutant  $\Delta cgeD \Delta spsI$  spores (PE3078). Experiments were performed in triplicate; error bars represent standard deviation. Though  $\Delta cgeD$  spores have an expanded PS layer by India ink staining and analyses of spore surface extracts, deletion of *cgeD* does not rescue the hydrophobic phenotype of  $\Delta spsI$  spores. **E.** BATH assay of  $\Delta cgeD$  spores (BKE19760) compared to wild type spores (168),  $\Delta ypqP$  ( $\Delta spsM-3'$ ) spores (BKK21670) and doubly mutant spores  $\Delta cgeD \Delta ypqP$  (PE3369). Experiments were performed in triplicate; error bars represent standard deviation. Deletion of *cgeD* does not rescue the hydrophobic phenotype of  $\Delta ypqP$  ( $\Delta spsM-3'$ ) spores.

Figure S6

A.

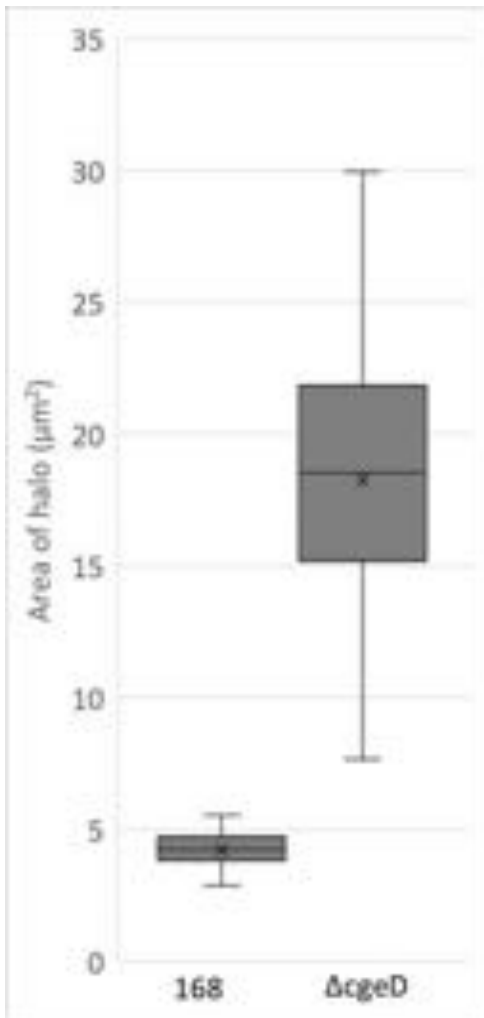

72 spores      30 spores  
spores      spores

B.

168 (NY200)

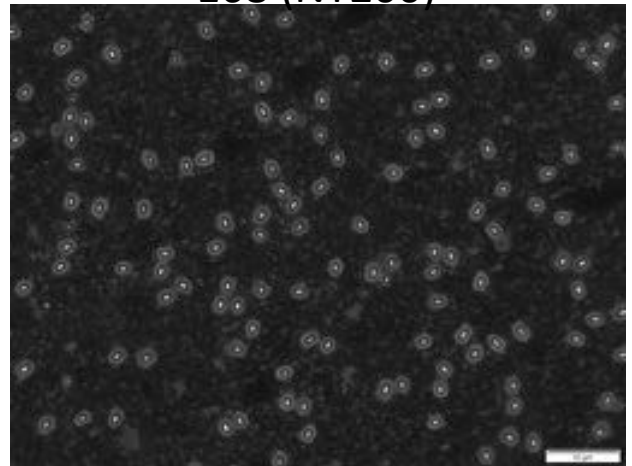

72 spores

ΔcgeD (BKE19750)

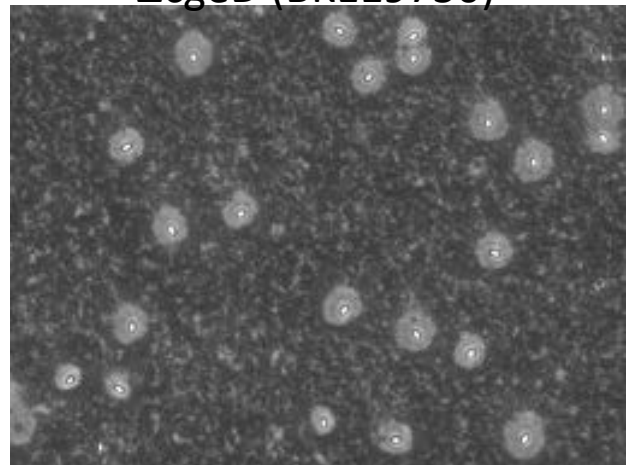

16 spores

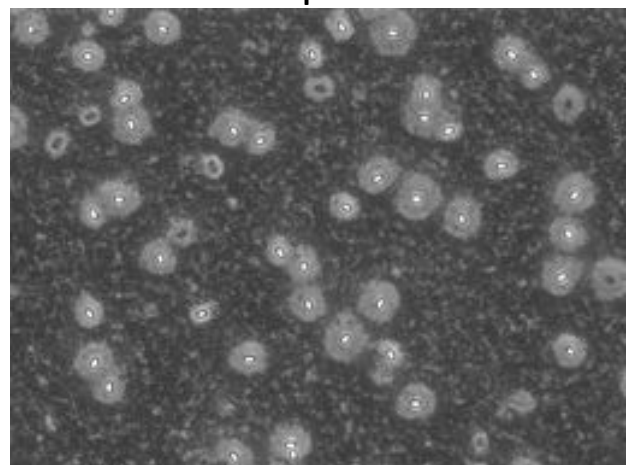

14 spores

Figure S6  
(continued)

C.

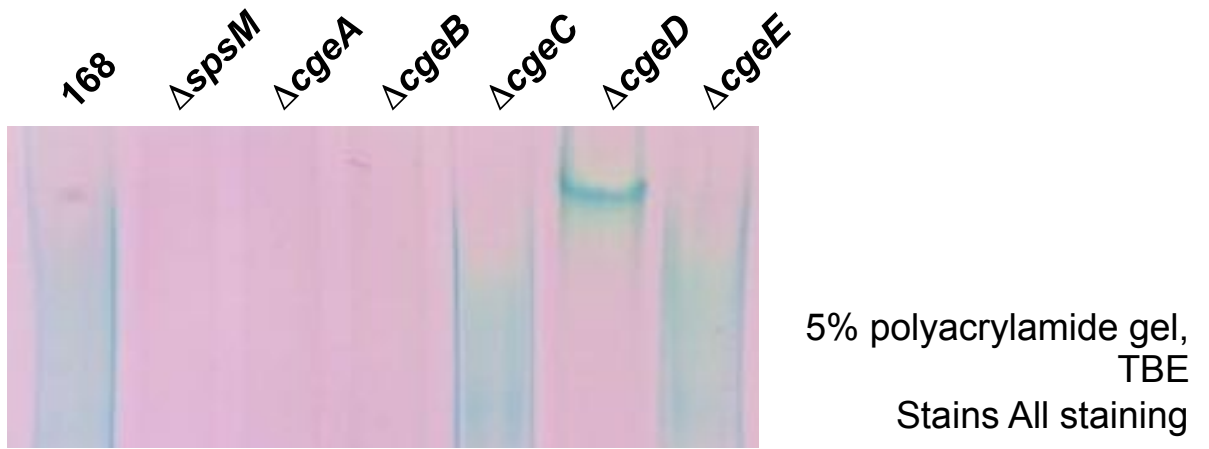

D.

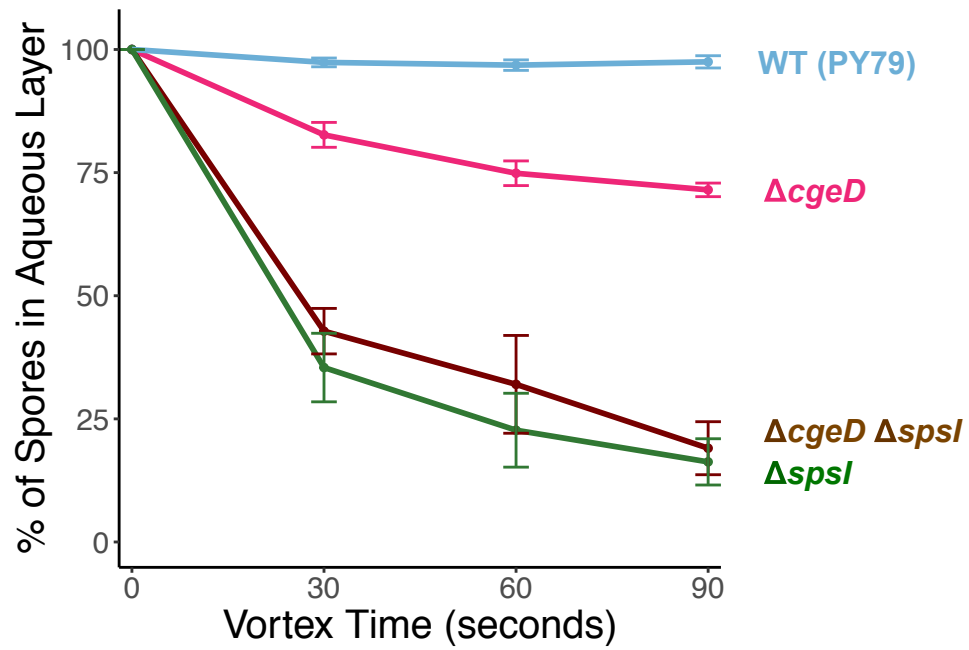

Figure S6  
(continued)

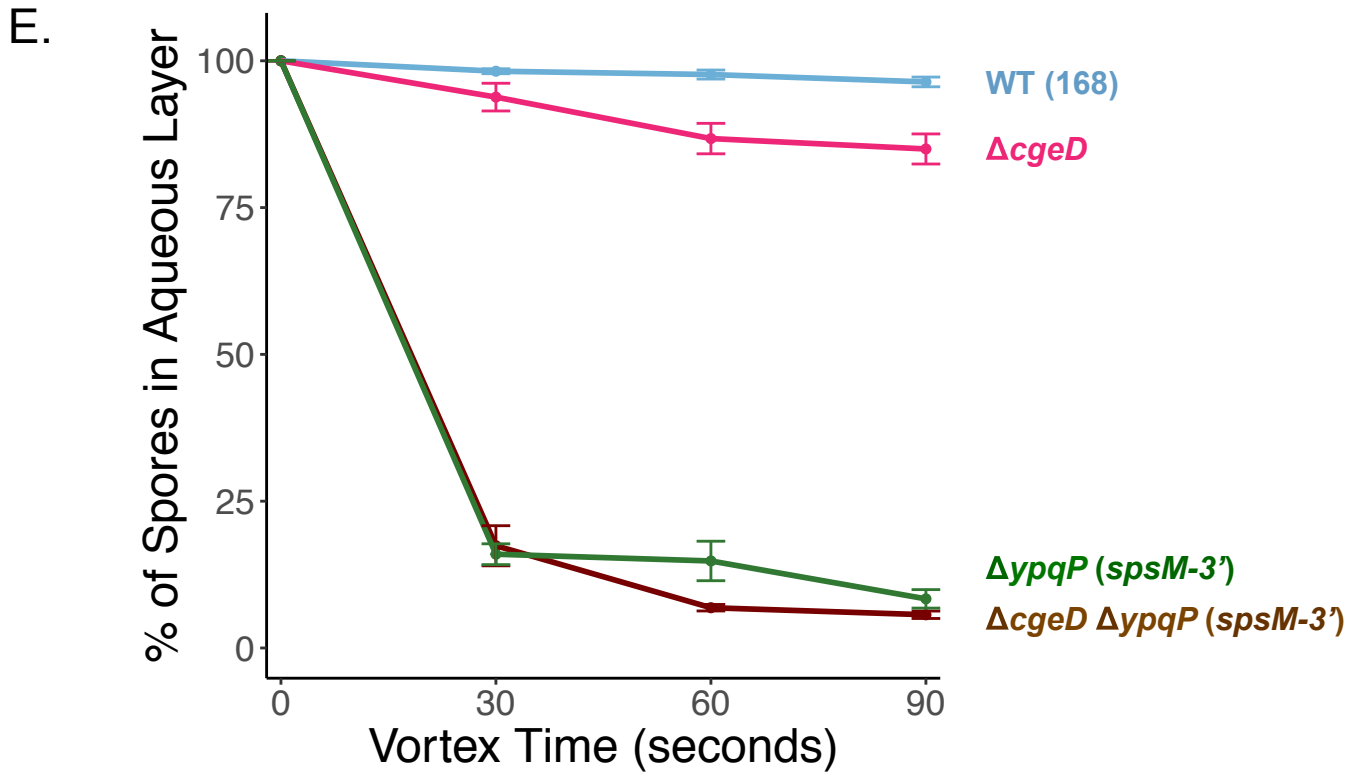

**Figure S7. Construction of strains NY35, NY212, NY226, NY227 and NY228.** **A.** Construction of strain NY35 with a deletion of the entire *yfnH-D* cluster. **B.** Construction of strain NY212 with a deletion of the entire *spsA-L* operon. **C.** Construction of strains NY226 (deletion of *cgeC*) and NY227 (deletion of *cgeD*). **D.** Construction of strain NY228 (deletion of *cgeE*).



Figure S7

A.

**NY35**

*B. subtilis* 168 chromosome

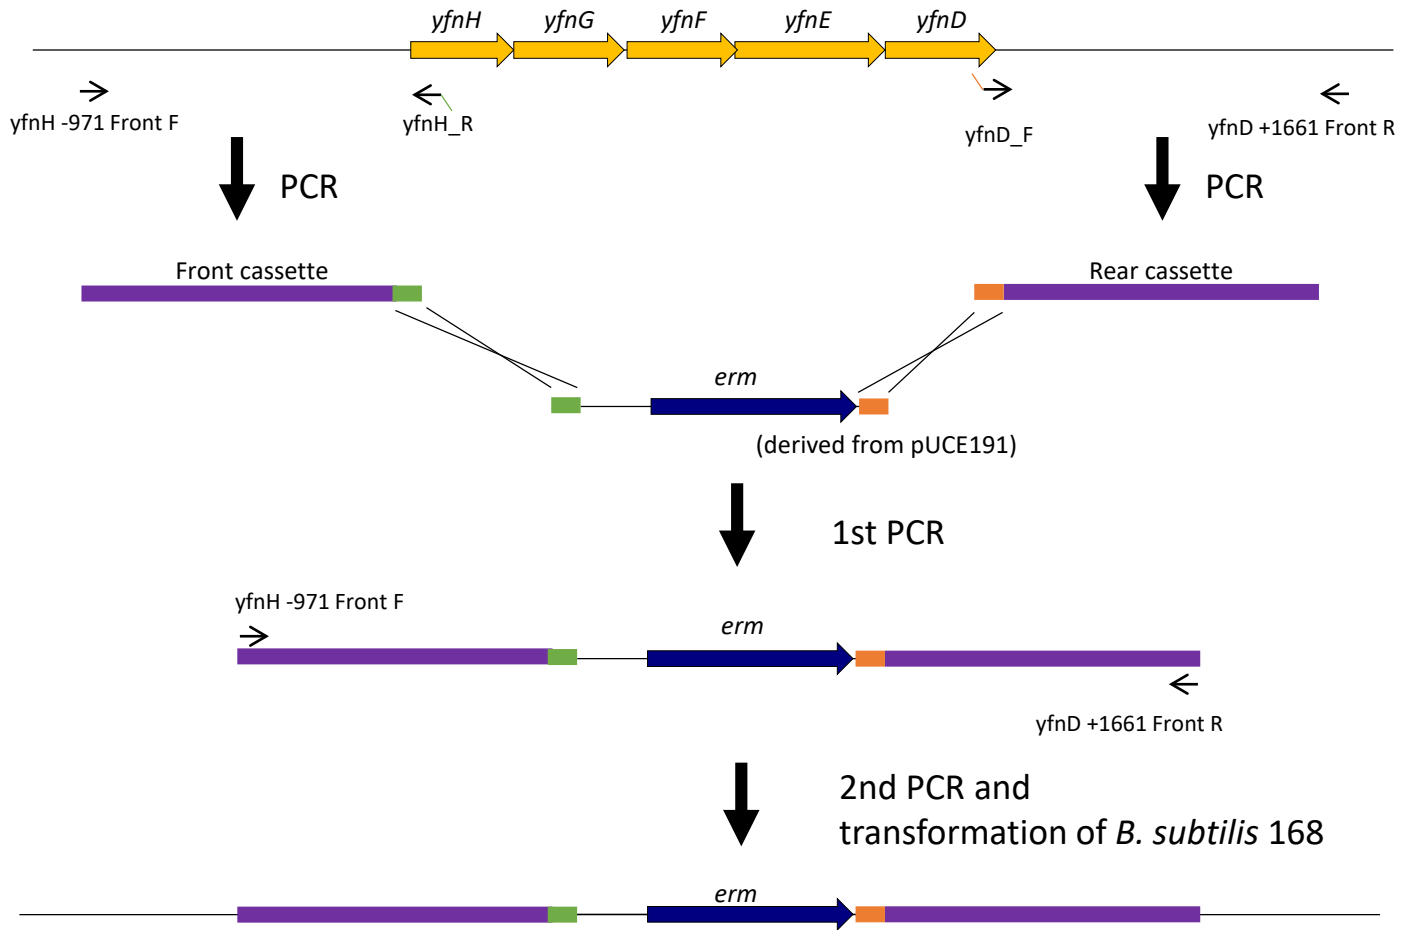

Figure S7  
(continued)

B.

**NY212**

*B. subtilis* 168 chromosome

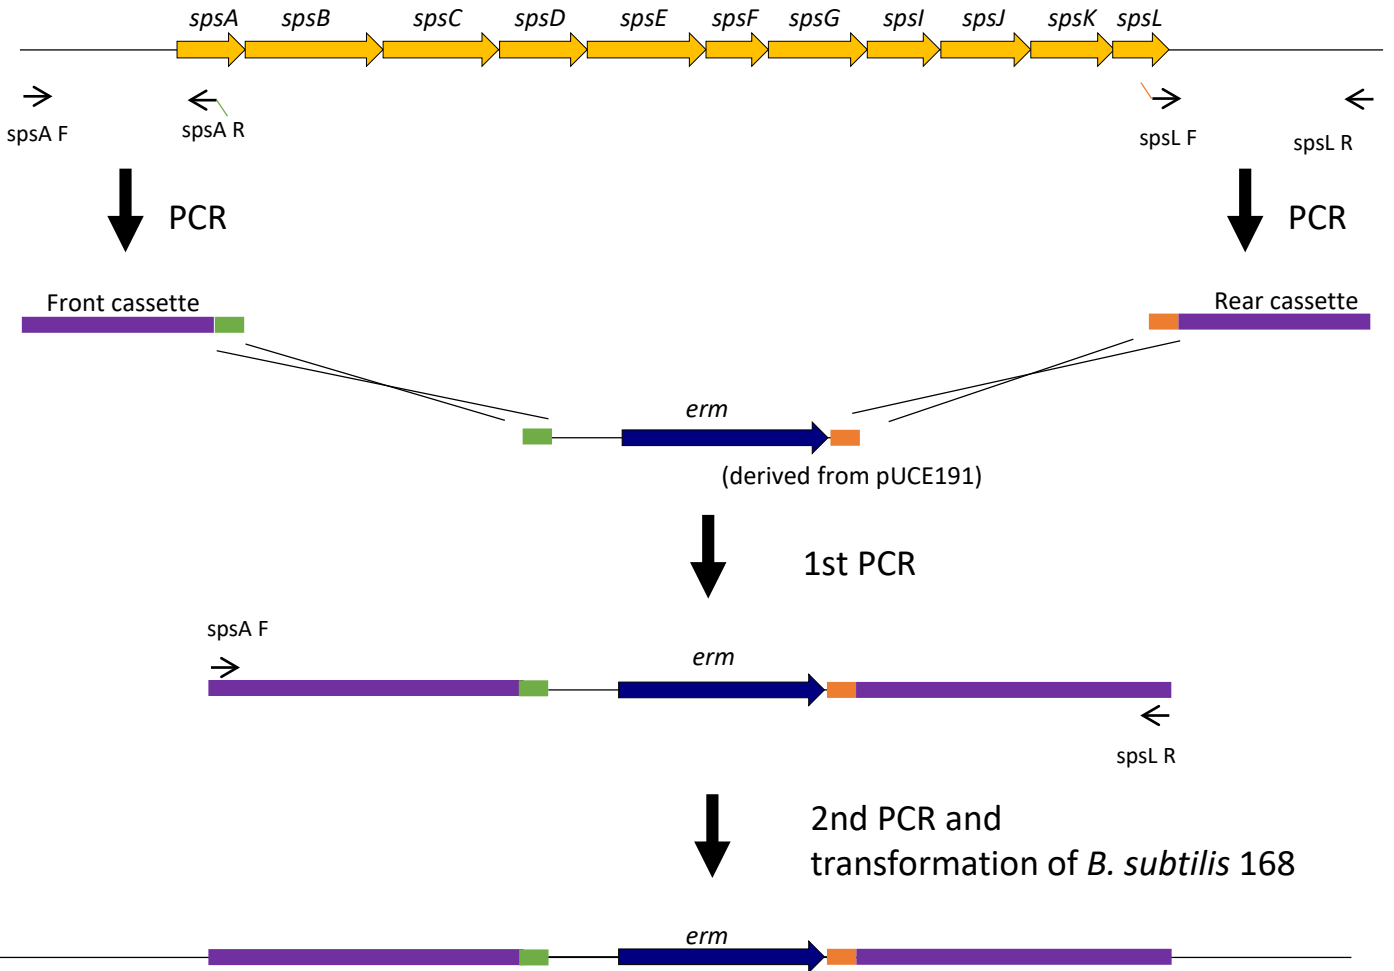

Figure S7  
(continued)

C.

**NY226, NY227**

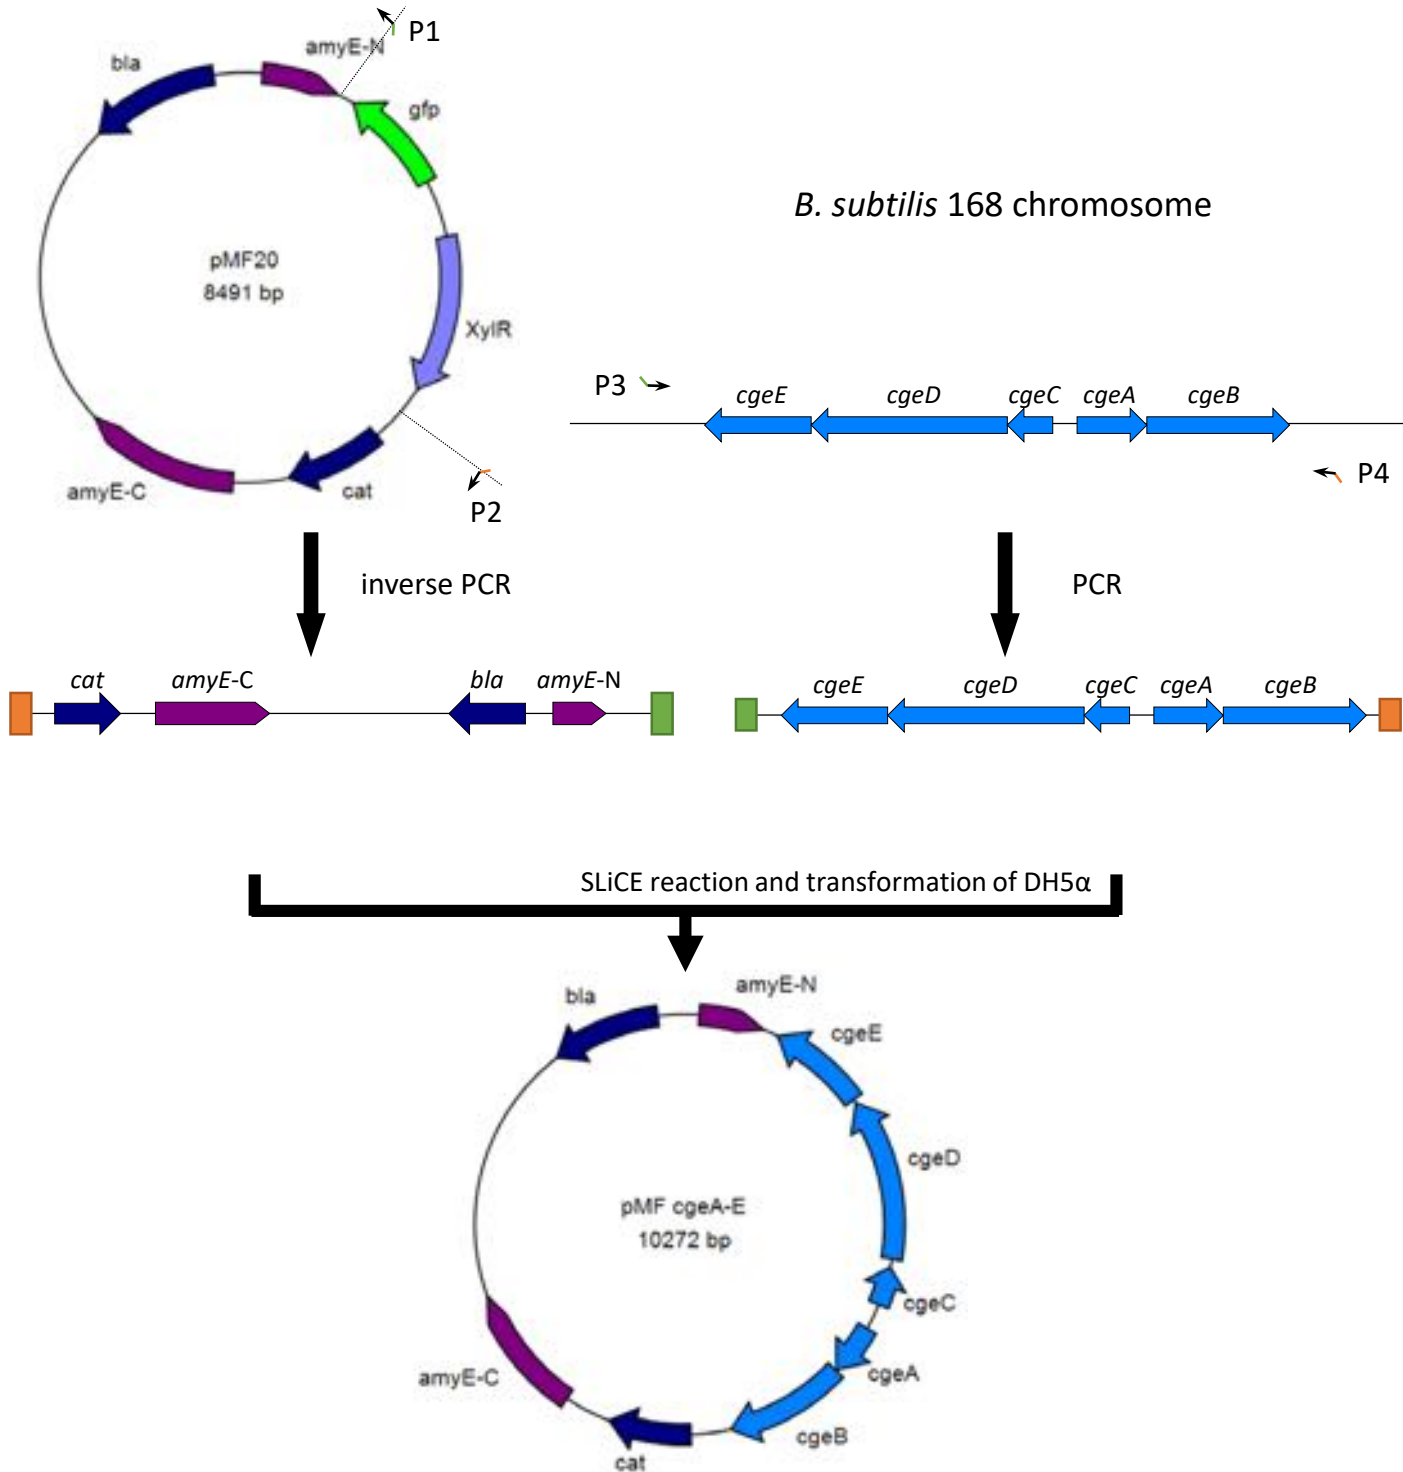

# Figure S7 (continued)

## NY226, NY227

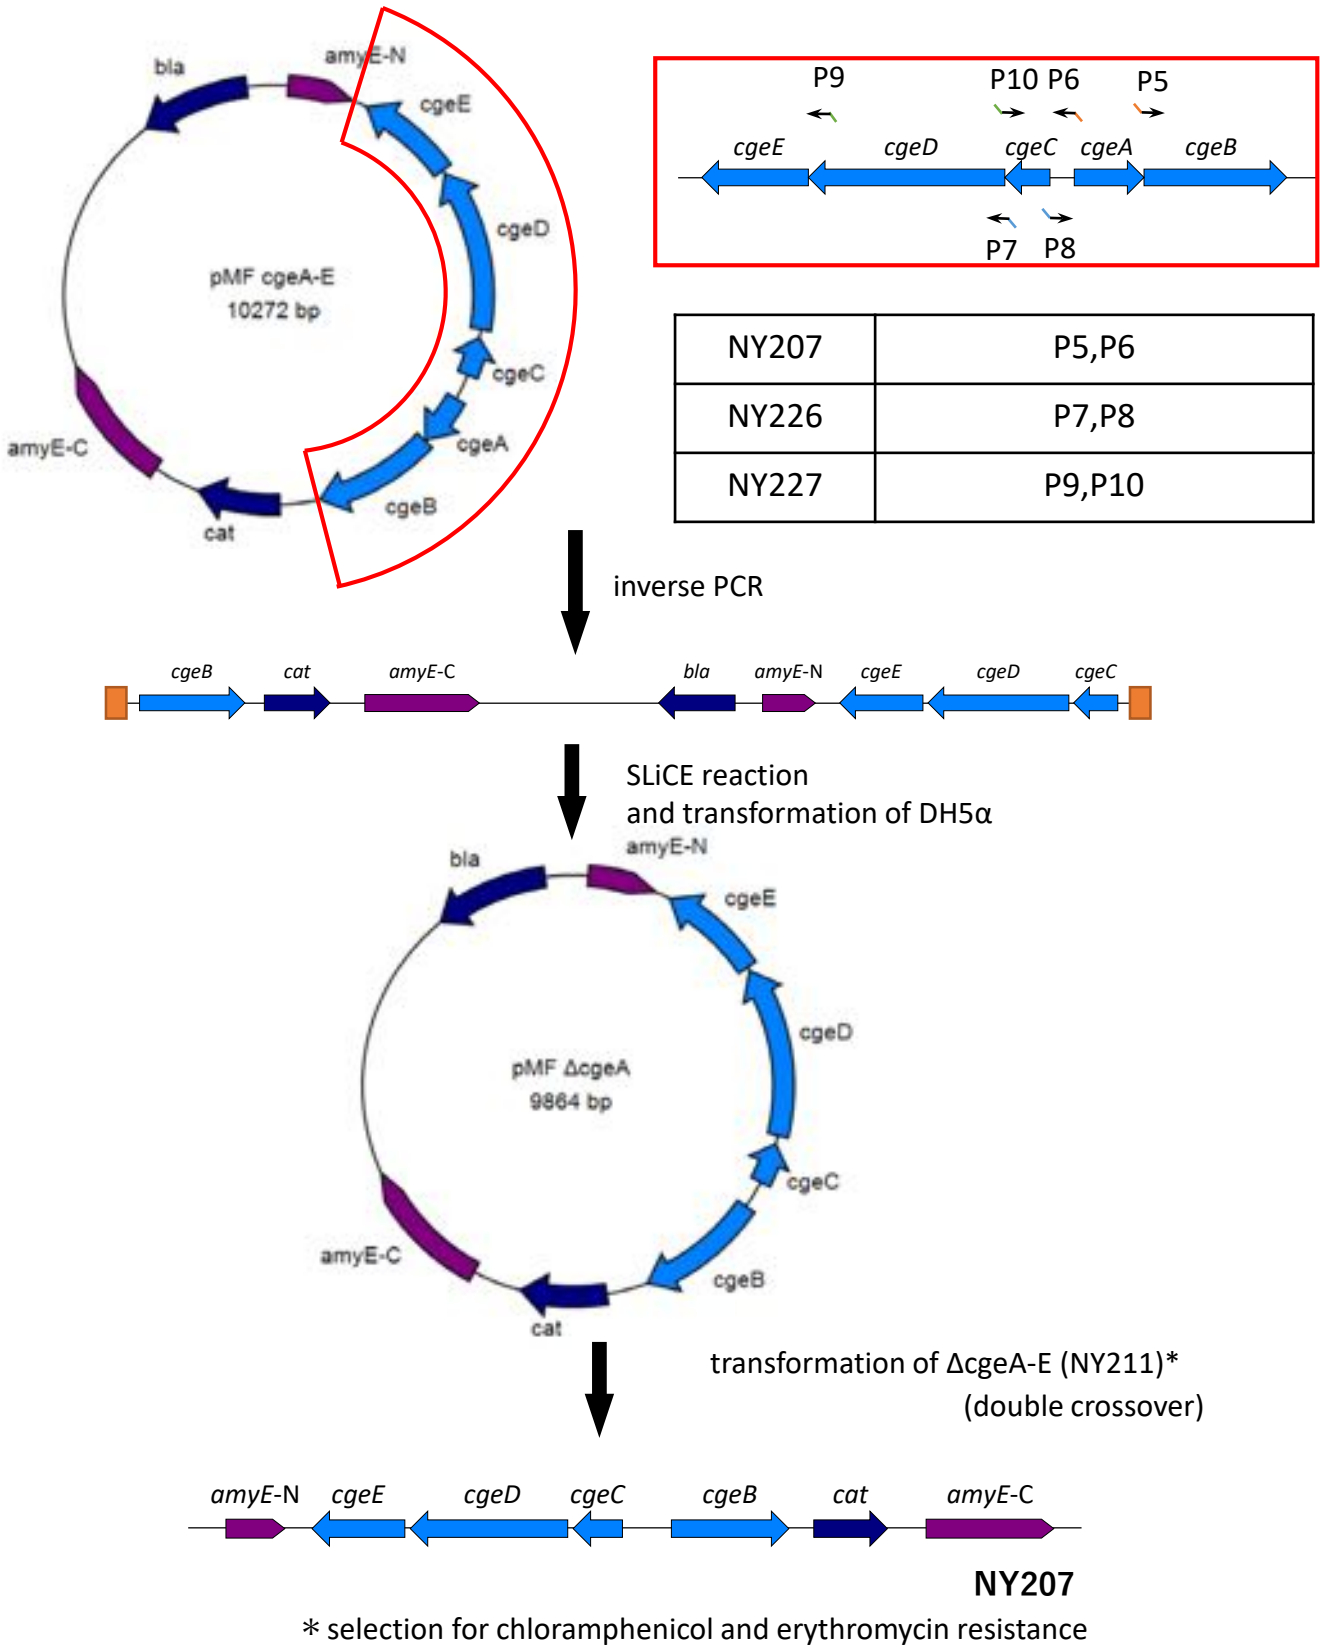

Figure S7  
(continued)

D.

**NY228**

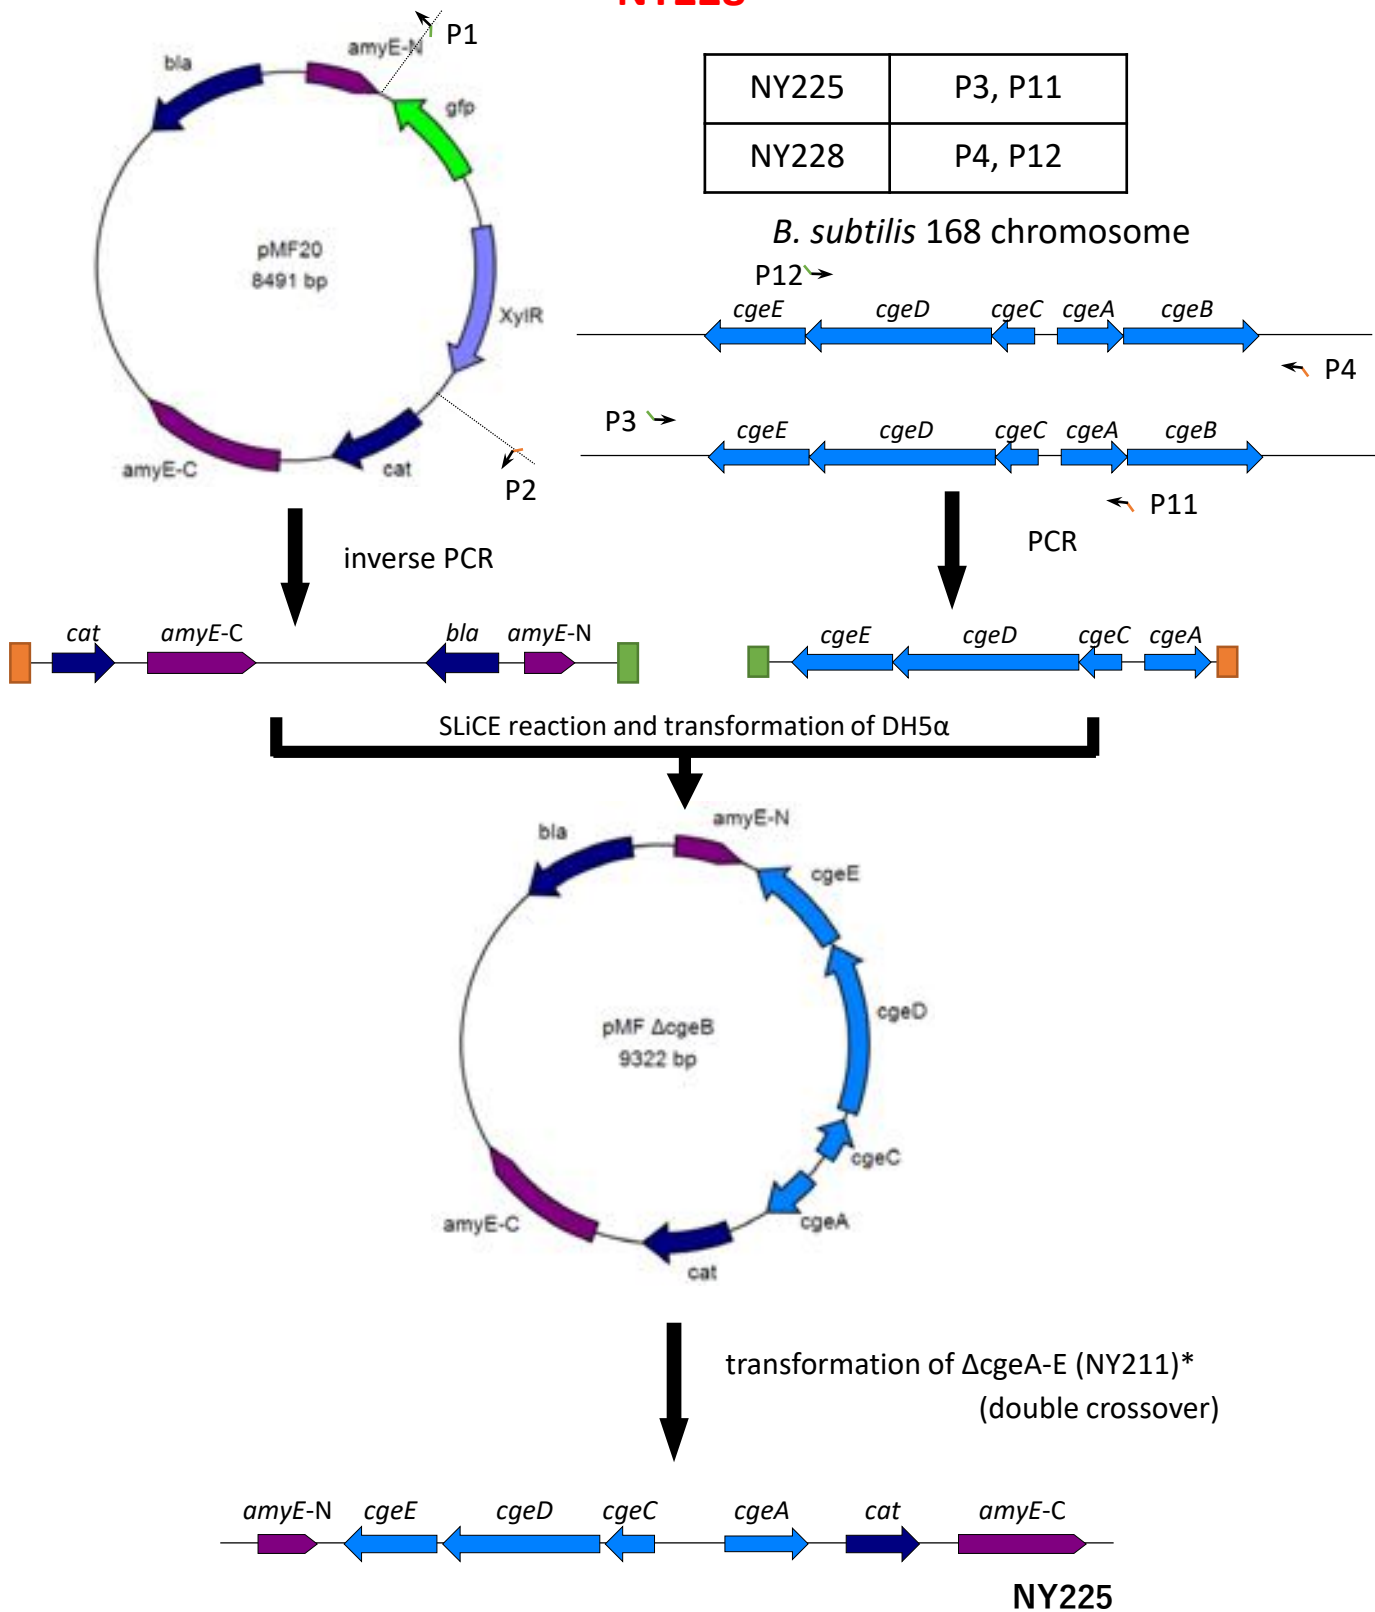

\* selection for chloramphenicol and erythromycin resistance

**Table S1: Bacterial strains used in this study**

| <b>Strain number</b> | <b>Genotype</b>          | <b>Back ground</b> | <b>Source</b>    |
|----------------------|--------------------------|--------------------|------------------|
| 168                  | <i>Bacillus subtilis</i> | Wild type          | Laboratory stock |
| PY79                 | <i>Bacillus subtilis</i> | Wild type          | (1)              |
| BKE07270             | $\Delta yfnH::erm$       | 168                | (2)              |
| BKE07280             | $\Delta yfnG::erm$       | 168                | (2)              |
| BKE07290             | $\Delta yfnF::erm$       | 168                | (2)              |
| BKE07300             | $\Delta yfnE::erm$       | 168                | (2)              |
| BKE07310             | $\Delta yfnD::erm$       | 168                | (2)              |
| BKE19750             | $\Delta cgeE::erm$       | 168                | (2)              |
| BKE19760             | $\Delta cgeD::erm$       | 168                | (2)              |
| BKE19770             | $\Delta cgeC::erm$       | 168                | (2)              |
| BKE19810             | $\Delta yodU::erm$       | 168                | (2)              |
| BKE21670             | $\Delta ypqP::erm$       | 168                | (2)              |
| BKE30850             | $\Delta ytdA::erm$       | 168                | (2)              |
| BKE30860             | $\Delta ytcA::erm$       | 168                | (2)              |
| BKE30870             | $\Delta ytcB::erm$       | 168                | (2)              |
| BKE30880             | $\Delta ytcC::erm$       | 168                | (2)              |
| BKE37810             | $\Delta spsL::erm$       | 168                | (2)              |
| BKE37820             | $\Delta spsK::erm$       | 168                | (2)              |
| BKE37830             | $\Delta spsJ::erm$       | 168                | (2)              |
| BKE37840             | $\Delta spsI::erm$       | 168                | (2)              |

|          |                                               |      |                                                                            |
|----------|-----------------------------------------------|------|----------------------------------------------------------------------------|
| BKE37850 | <i>ΔspsG::erm</i>                             | 168  | (2)                                                                        |
| BKE37860 | <i>ΔspsF::erm</i>                             | 168  | (2)                                                                        |
| BKE37870 | <i>ΔspsE::erm</i>                             | 168  | (2)                                                                        |
| BKE37880 | <i>ΔspsD::erm</i>                             | 168  | (2)                                                                        |
| BKE37890 | <i>ΔspsC::erm</i>                             | 168  | (2)                                                                        |
| BKE37900 | <i>ΔspsB::erm</i>                             | 168  | (2)                                                                        |
| BKE37910 | <i>ΔspsA::erm</i>                             | 168  | (2)                                                                        |
| HS176    | <i>cotZΩpHS2 (cotZ-gfp spc)</i>               | PY79 | (3)                                                                        |
| NY6      | <i>amyE::cotX-gfp cat</i>                     | 168  | (4)                                                                        |
| NY10     | <i>amyE::cotY-gfp cat</i>                     | 168  | (4)                                                                        |
| NY17     | <i>amyE::cgeA-gfp cat</i>                     | 168  | (4)                                                                        |
| NY35     | <i>ΔyfnH-D::erm</i>                           | 168  | This study                                                                 |
| NY211    | <i>ΔcgeA-E::erm</i>                           | 168  | This study                                                                 |
| NY212    | <i>ΔspsA-L::erm</i>                           | 168  | This study                                                                 |
| NY226    | <i>ΔcgeA-E::erm<br/>amyE::cgeAB-cgeDE cat</i> | 168  | This study                                                                 |
| NY227    | <i>ΔcgeA-E::erm<br/>amyE::cgeAB-cgeCE cat</i> | 168  | This study                                                                 |
| NY228    | <i>ΔcgeA-E::erm<br/>amyE::cgeAB-cgeCD cat</i> | 168  | This study                                                                 |
| PE2763   | <i>ΔspsI::erm</i>                             | PY79 | Derived from BKE37840                                                      |
| PE2764   | <i>ΔytdA::erm</i>                             | PY79 | Derived from BKE30850                                                      |
| PE2767   | <i>ΔytcA::erm</i>                             | PY79 | Derived from BKE30860                                                      |
| PE2777   | <i>ΔspsI::erm::spc</i>                        | PY79 | Derived from PE2763,<br>resistance switched by insertion<br>of pEr::Sp (5) |
| PE2914   | <i>ΔcgeD::erm</i>                             | 168  | Derived from BKE19760                                                      |
| PE2917   | <i>ΔcgeC::erm</i>                             | PY79 | Derived from BKE19770                                                      |
| PE2918   | <i>ΔcgeD::erm</i>                             | PY79 | Derived from BKE19760                                                      |
| PE2919   | <i>ΔyfnH::erm</i>                             | PY79 | Derived from BKE07270                                                      |

|        |                                            |      |                       |
|--------|--------------------------------------------|------|-----------------------|
| PE2945 | <i>ΔytcB::erm</i>                          | PY79 | Derived from BKE30870 |
| PE2946 | <i>ΔytcC::erm</i>                          | PY79 | Derived from BKE30880 |
| PE2958 | <i>ΔspsJ::erm</i>                          | PY79 | Derived from BKE37830 |
| PE2959 | <i>ΔspsK::erm</i>                          | PY79 | Derived from BKE37820 |
| PE2960 | <i>ΔspsL::erm</i>                          | PY79 | Derived from BKE37810 |
| PE2961 | <i>ΔyfnG::erm</i>                          | PY79 | Derived from BKE07280 |
| PE3060 | <i>ΔyfnD::erm</i>                          | PY79 | Derived from BKE07310 |
| PE3062 | <i>ΔyfnF::erm</i>                          | PY79 | Derived from BKE07290 |
| PE3063 | <i>ΔyfnE::erm</i>                          | PY79 | Derived from BKE07300 |
| PE3065 | <i>ΔcgeE::erm</i>                          | PY79 | Derived from BKE19750 |
| PE3078 | <i>ΔcgeD::kan ΔspsI::erm</i>               | PY79 | PE2763→RL1405         |
| PE3111 | <i>ΔspsI::kan</i>                          | PY79 | Derived from BKK37840 |
| PE3115 | <i>ΔyfnH::kan</i>                          | PY79 | Derived from BKK07270 |
| PE3117 | <i>ΔyfnE::erm ΔspsI::kan</i>               | PY79 | PE3063→PE3111         |
| PE3118 | <i>ΔyfnF::erm ΔspsI::kan</i>               | PY79 | PE3062→PE3111         |
| PE3119 | <i>ΔyfnH::erm ΔspsI::kan</i>               | PY79 | PE2919→PE3111         |
| PE3151 | <i>amyE::cotX-gfp cat</i>                  | PY79 | (4)                   |
| PE3158 | <i>amyE::cotY-gfp cat</i>                  | PY79 | (4)                   |
| PE3216 | <i>ΔyodU::erm</i>                          | 168  | Derived from BKE19810 |
| PE3218 | <i>ΔypqP::erm</i>                          | 168  | Derived from BKE21670 |
| PE3220 | <i>ΔyfnH::kan ΔspsA::erm</i>               | 168  | PE3115→PE3203         |
| PE3221 | <i>ΔyfnH::kan ΔspsB::erm</i>               | 168  | PE3115→PE3204         |
| PE3222 | <i>ΔyfnH::kan ΔspsC::erm</i>               | 168  | PE3115→PE3205         |
| PE3223 | <i>ΔyfnH::kan ΔspsD::erm</i>               | 168  | PE3115→PE3206         |
| PE3224 | <i>ΔyfnH::kan ΔspsE::erm</i>               | 168  | PE3115→PE3207         |
| PE3225 | <i>ΔyfnH::kan ΔspsF::erm</i>               | 168  | PE3115→PE3208         |
| PE3226 | <i>ΔyfnH::kan ΔspsJ::erm</i>               | 168  | PE3115→PE2958         |
| PE3227 | <i>ΔyfnH::kan ΔspsK::erm</i>               | 168  | PE3115→PE2959         |
| PE3228 | <i>ΔyfnH::kan ΔspsL::erm</i>               | 168  | PE3115→PE2960         |
| PE3229 | <i>ΔyfnH::kan ΔypqP::erm</i>               | 168  | PE3115→PE3218         |
| PE3232 | <i>ΔyfnG::kan ΔspsI::erm</i>               | PY79 | PE3111→PE3060         |
| PE3233 | <i>ΔyfnH::kan ΔcgeD::erm</i>               | PY79 | PE3115→PE2918         |
| PE3235 | <i>ΔspsI::spc ΔyfnH::kan ΔcgeD::erm</i>    | PY79 | PE2777→PE33233        |
| PE3242 | <i>ΔspsI::erm amyE::cotY-gfp cat</i>       | PY79 | NY10→PE2763           |
| PE3243 | <i>ΔyfnH::erm amyE::cotY-gfp cat</i>       | PY79 | NY10→PE2919           |
| PE3244 | <i>ΔyfnH::erm amyE::cotX-gfp cat</i>       | PY79 | NY6→PE2919            |
| PE3245 | <i>ΔspsI::erm amyE::cotX-gfp cat</i>       | PY79 | NY6→PE2763            |
| PE3247 | <i>ΔyfnH::erm cotZΩpHS2 (cotZ-gfp spc)</i> | PY79 | HS176→PE2919          |
| PE3248 | <i>ΔspsI::erm cotZΩpHS2 (cotZ-gfp spc)</i> | PY79 | HS176→PE2763          |



|        |                                      |      |                                                           |
|--------|--------------------------------------|------|-----------------------------------------------------------|
| PE3260 | <i>amyE::cgeA-gfp cat</i>            | PY79 | (4)                                                       |
| PE3303 | <i>ΔspsA::erm</i>                    | 168  | Derived from BKE37910                                     |
| PE3304 | <i>ΔspsB::erm</i>                    | 168  | Derived from BKE37900                                     |
| PE3305 | <i>ΔspsC::erm</i>                    | 168  | Derived from BKE37890                                     |
| PE3306 | <i>ΔspsD::erm</i>                    | 168  | Derived from BKE37880                                     |
| PE3307 | <i>ΔspsE::erm</i>                    | 168  | Derived from BKE37870                                     |
| PE3308 | <i>ΔspsF::erm</i>                    | 168  | Derived from BKE37860                                     |
| PE3309 | <i>ΔspsG::erm</i>                    | 168  | Derived from BKE37850                                     |
| PE3310 | <i>ΔspsJ::kan</i>                    | 168  | Derived from BKE37830                                     |
| PE3311 | <i>ΔspsK::kan</i>                    | 168  | Derived from BKE37820                                     |
| PE3312 | <i>ΔspsL::kan</i>                    | 168  | Derived from BKE37810                                     |
| PE3313 | <i>ΔspsI::kan</i>                    | 168  | Derived from BKK37840                                     |
| PE3314 | <i>ΔypqP::kan</i>                    | 168  | Derived from BKK21670                                     |
| PE3322 | <i>ΔyfnH::erm amyE::cgeA-gfp cat</i> | PY79 | NY17→PE2919                                               |
| PE3323 | <i>ΔspsI::erm amyE::cgeA-gfp cat</i> | PY79 | NY17→PE2763                                               |
| PE3341 | <i>ΔspsA::erm</i>                    | PY79 | Derived from BKE37910                                     |
| PE3342 | <i>ΔspsB::erm</i>                    | PY79 | Derived from BKE37900                                     |
| PE3343 | <i>ΔspsC::erm</i>                    | PY79 | Derived from BKE37890                                     |
| PE3344 | <i>ΔspsD::erm</i>                    | PY79 | Derived from BKE37880                                     |
| PE3345 | <i>ΔspsE::erm</i>                    | PY79 | Derived from BKE37870                                     |
| PE3346 | <i>ΔspsF::erm</i>                    | PY79 | Derived from BKE37860                                     |
| PE3347 | <i>ΔspsG::erm</i>                    | PY79 | Derived from BKE37850                                     |
| PE3348 | <i>ΔspsJ::kan</i>                    | PY79 | Derived from BKK37830                                     |
| PE3349 | <i>ΔspsK::kan</i>                    | PY79 | Derived from BKK37820                                     |
| PE3350 | <i>ΔspsL::kan</i>                    | PY79 | Derived from BKK37810                                     |
| PE3352 | <i>ΔspsA</i>                         | PY79 | PE3341 with <i>erm</i> resistance removed (using pDR244a) |
| PE3353 | <i>ΔspsB</i>                         | PY79 | PE3342 with <i>erm</i> resistance removed (using pDR244a) |
| PE3354 | <i>ΔspsC</i>                         | PY79 | PE3343 with <i>erm</i> resistance removed (using pDR244a) |
| PE3379 | <i>ΔspsD</i>                         | PY79 | PE3344 with <i>erm</i> resistance removed (using pDR244a) |
| PE3355 | <i>ΔspsE</i>                         | PY79 | PE3345 with <i>erm</i> resistance removed (using pDR244a) |
| PE3356 | <i>ΔspsG</i>                         | PY79 | PE3347 with <i>erm</i> resistance removed (using pDR244a) |
| PE3357 | <i>ΔyfnD::erm ΔspsI::kan</i>         | PY79 | PE2919→PE3060                                             |
| PE3358 | <i>ΔytdA</i>                         | PY79 | PE2764 with <i>erm</i> resistance removed (using pDR244a) |
| PE3359 | <i>ΔytcA</i>                         | PY79 | PE2767 with <i>erm</i> resistance removed (using pDR244a) |

|        |                                     |      |                                                           |
|--------|-------------------------------------|------|-----------------------------------------------------------|
| PE3360 | $\Delta ytcB$                       | PY79 | PE2945 with <i>erm</i> resistance removed (using pDR244a) |
| PE3361 | $\Delta yfnE$                       | PY79 | PE3063 with <i>erm</i> resistance removed (using pDR244a) |
| PE3362 | $\Delta yfnF$                       | PY79 | PE3062 with <i>erm</i> resistance removed (using pDR244a) |
| PE3363 | $\Delta yfnG$                       | PY79 | PE2961 with <i>erm</i> resistance removed (using pDR244a) |
| PE3364 | $\Delta yfnH$                       | PY79 | PE2919 with <i>erm</i> resistance removed (using pDR244a) |
| PE3365 | $\Delta cgeD$                       | PY79 | PE2918 with <i>erm</i> resistance removed (using pDR244a) |
| PE3369 | $\Delta cgeD::erm \Delta ypqP::kan$ | 168  | BKE19760→PE2918                                           |
| RL1405 | $\Delta cgeD::kan$                  | PY79 | (6)                                                       |

## REFERENCES

1. Youngman P, Perkins JB, Losick R. 1984. Construction of a cloning site near one end of Tn917 into which foreign DNA may be inserted without affecting transposition in *Bacillus subtilis* or expression of the transposon-borne *erm* gene. *Plasmid* 12:1-9.
2. Koo BM, Kritikos G, Farelli JD, Todor H, Tong K, Kimsey H, Wapinski I, Galardini M, Cabal A, Peters JM, Hachmann AB, Rudner DZ, Allen KN, Typas A, Gross CA. 2017. Construction and Analysis of Two Genome-Scale Deletion Libraries for *Bacillus subtilis*. *Cell Syst* 4:291-305 e7.
3. Kim H, Hahn M, Grabowski P, McPherson DC, Otte MM, Wang R, Ferguson CC, Eichenberger P, Driks A. 2006. The *Bacillus subtilis* spore coat protein interaction network. *Mol Microbiol* 59:487-502.
4. Shuster B, Khemmani M, Abe K, Huang X, Nakaya Y, Maryn N, Buttar S, Gonzalez AN, Driks A, Sato T, Eichenberger P. 2018. Contributions of crust proteins to spore surface properties in *Bacillus subtilis*. *Mol Microbiol* doi:10.1111/mmi.14194.
5. Steinmetz M, Richter R. 1994. Plasmids designed to alter the antibiotic resistance expressed by insertion mutations in *Bacillus subtilis*, through in vivo recombination. *Gene* 142:79-83.
6. Roels S, Losick R. 1995. Adjacent and divergently oriented operons under the control of the sporulation regulatory protein GerE in *Bacillus subtilis*. *J Bacteriol* 177:6263-75.

**Table S2: Primers used in this study**

| Primer name                       | Sequence (5'→3')                     | Location <sup>1</sup>                      |
|-----------------------------------|--------------------------------------|--------------------------------------------|
| spsA F                            | ATTACCATCTTGCTGATCGT                 | <i>spsA</i> sense sequence -1950           |
| spsA R                            | ccatgcgtttgggccTACATTCAGCGTCTC       | <i>spsA</i> anti-sense sequence +145       |
| spsL F                            | ccaaggagatggccgCGTGGGATGATGAGA       | <i>spsF</i> sense sequence +407            |
| spsL R                            | ACGACGATTGACGCCTGAAT                 | <i>spsF</i> anti-sense sequence +2386      |
| yfnH -971 Front F                 | AAGCCGTTCTTTACAGAATCGATTCCAAAG       | <i>yfnH</i> sense strand -971              |
| yfnH_R                            | ccatgcgtttgggccTCATAATATGCCATA       | <i>yfnH</i> anti-sense strand +101         |
| yfnD_F                            | ccaaggagatggccgGACAATTAAGATGAT       | <i>yfnD</i> sense strand +809              |
| yfnD+1661 Front R                 | GCCGCTCGGGCAATTCGGCGCTGTTTGTT        | <i>yfnD</i> anti-sense strand +1661        |
| ermC bstBF                        | ggcccaaacgcatggTAAACGTATATAGAT       | pUCE191 <i>ermC</i> sense strand -370      |
| ermC bstAR                        | cggccatctccttggTCGCGCGTTTCGGTG       | pUCE191 <i>ermC</i> anti-sense strand +973 |
| P1<br>(SLiCE<br>pMF20<br>BamHI F) | GGATCCTGAGCGCCGGTCGCTACCATTACCAGTTG  | pMF20 <i>gfp</i> sense strand +752         |
| P2<br>(SLiCE<br>pMF20<br>EcoRI R) | GAATTCTCATGTTTGACAGCTTATCATCGGCAATA  | pMF20 <i>xylR</i> sense strand +1180       |
| P3<br>( <i>cgeE</i> +765<br>BR)   | cggcgctcaggatccTATTTTCATGTAAGGAAATAA | <i>cgeE</i> anti-sense strand +765         |
| P4<br>( <i>cgeB</i> +1027<br>ER)  | caaacatgagaattcGAAAGACCGTTCTGACGGCT  | <i>cgeB</i> anti-sense strand +1027        |
| P5<br>( <i>cgeA</i> +408<br>F)    | tgtgtgtaatgaaagTCTTGTATATCCAGTCGGGA  | <i>cgeA</i> sense strand +408              |

|                                  |                                      |                                  |
|----------------------------------|--------------------------------------|----------------------------------|
| P6<br>( <i>cgeA</i> -1 R)        | ctttcattacacacaCCTCCTATTCGATAGTGAAC  | <i>cgeA</i> anti-sense strand -1 |
| P7<br>( <i>cgeC</i> +370 F)      | gggatgatatgggagAGAAAGTGTCTATTATTTTA  | <i>cgeC</i> sense strand +370    |
| P8<br>( <i>cgeC</i> -1 R)        | ctcccatatcatcccTCTCCCTTATCCTTATCTCT  | <i>cgeC</i> anti-sense strand -1 |
| P9<br>( <i>cgeD</i> +1309 F)     | cggtatagatgacagGACATTATTCAAAAACGGAA  | <i>cgeD</i> sense strand +1309   |
| P10<br>( <i>cgeD</i> -1 R)       | ctgtcatctataaccgCCTCCCGCCGTCAAACATAA | <i>cgeD</i> anti-sense strand -1 |
| P11<br>( <i>cgeB</i> -1 R SLiCE) | atgagaattcCGGATGTTATGAAAAGAACGTAACG  | <i>cgeB</i> anti-sense strand -1 |
| P12<br>( <i>cgeE</i> -1 R SLiCE) | ctcaggatccGAACGTCTCCTTTTTTATGACCTATA | <i>cgeE</i> anti-sense strand -1 |

<sup>1</sup>Indicates the 3' end position of the primer relative to the first nucleotide of the coding sequence
